1 **Dose-response relationship among body mass index, abdominal adiposity and atrial fibrillation in**  
2 **patients undergoing cardiac surgery: a meta-analysis of 30 prospective studies**

**Running title:** Adiposity and atrial fibrillation after cardiac surgery

Menglu Liu<sup>\*1</sup>, M.D., Kaibo Mei<sup>\*2</sup>, M.D., Jianyong Ma<sup>3</sup>, M.D., Ph.D., Peng Yu<sup>4</sup>, M.D., Ph.D., Lixia Xie<sup>5</sup>,  
M.D., Yujie Zhao<sup>1</sup>, M.D., Xiao Liu<sup>6</sup>, M.D., Ph.D.

1 Department of Cardiology, The Seventh People's Hospital of Zhengzhou, Zhengzhou, Henan, 450016,  
China.

2 Anesthesiology Department, the People's Hospital of Shangrao, Jiangxi, 330006, China

3Department of Pharmacology and Systems Physiology University of Cincinnati College of Medicine,  
Cincinnati, OH 45267

4 Department of Endocrine, the Second Affiliated Hospital of Nanchang University, Jiangxi, 330006, China

5 Department of Respiratory and Critical Care Medicine, the Second Affiliated Hospital of Nanchang  
University, Jiangxi, 330006, China

6 Department of Cardiology, the Second Affiliated Hospital of Nanchang University, Jiangxi, 330006, China

3 **Corresponding author:**

4 Yujie Zhao, MD., Department of Cardiology, The Seventh People's Hospital, Zhengzhou, Henan Jiangxi,  
5 330006, China, Email: [184231892@qq.com](mailto:184231892@qq.com)

Dr. Xiao Liu, M.D., Ph.D., Department of Cardiology, The Second Affiliated Hospital of Sun Yat-Sen  
University, Guangzhou, 510080, Guangdong, China.

\*These authors contribute equally

**Word count:** 3152

**Conflicts of interest:** None.

**Keyword:** obesity paradox; atrial fibrillation; dose-response; meta-analysis; body mass index; risk factor

6

## Abstract

7 **Background:** Whether being overweight increases the risk of postoperative atrial fibrillation (POAF) is  
8 unclear, and whether adiposity independently contributes to POAF has not been comprehensively studied.  
9 Thus, we conducted a meta-analysis to clarify the strength and shape of the exposure-effect relationship  
10 between adiposity and POAF.

11 **Methods:** The PubMed, Cochrane Library, and EMBASE databases were searched for prospective studies  
12 (RCTs, cohort studies, and nest-case control studies) reporting data regarding the relationship between  
13 adiposity and the risk of POAF.

14 **Results:** Thirty publications involving 139,302 patients were included. Analysis of categorical variables  
15 showed that obesity (RR: 1.39,  $P < 0.001$ ), but not being underweight (RR: 1.44,  $P = 0.13$ ) or being overweight  
16 (RR: 1.03,  $P = 0.48$ ), was associated with an increased risk of POAF. In the exposure-effect analysis, the  
17 summary RR for a 5-unit increment in body mass index (BMI) was 1.09 ( $P < 0.001$ ) for the risk of POAF.  
18 There was a significant linear relationship between BMI and POAF ( $P_{\text{nonlinearity}} = 0.91$ ); the curve was flat and  
19 began to rise steeply at a BMI of approximately 30. Notably, BMI levels below 30 (overweight) were not  
20 associated with a higher risk of POAF. In the subgroup analysis of surgery types, the pooled RR values for a  
21 BMI increase of 5 for coronary artery bypass graft and valve surgery were 1.21 ( $P < 0.01$ ) and 1.34 ( $P = 0.25$ ),  
22 respectively, suggesting that a potential difference in the association exists by surgery type. Additionally,  
23 waist obesity was associated with the risk of POAF (RR: 1.55,  $P < 0.001$ ).

24 **Conclusion:** Based on the current evidence, our findings show that adiposity was independently associated  
25 with an increased risk of POAF, while being underweight or overweight might not significantly increase the  
26 POAF risk. The magnitude of the effect of obesity on AF in patients undergoing valve surgery might be  
27 small, and this finding needs to be further confirmed.

**Keywords:** overweight; obesity; waist circumference; atrial fibrillation; cardiac surgery; body mass index;  
coronary artery bypass graft

## 28 Introduction

29 The prevalence of overweight and obesity has rapidly increased in recent decades in both developing and  
30 developed countries<sup>[1-3]</sup>. This increase has raised serious public health concerns due to the positive  
31 association between overweight and obesity and an increased risk of various chronic diseases, including  
32 cardiovascular diseases, metabolic syndrome, all-cause mortality, and several types of cancer<sup>[4-7]</sup>.

33 Postoperative atrial fibrillation (POAF) is among the most common complications arising from cardiac  
34 surgery, affecting between 20% and 50% of patients, and is associated with significantly worse adverse  
35 outcomes (such as all-cause death and stroke)<sup>[8]</sup>. Several prospective studies have reported increased POAF  
36 with a higher body mass index<sup>[9-11]</sup> (BMI, kg/m<sup>2</sup>). Although various studies reported a positive association  
37 between obesity (BMI>30) and POAF in patients undergoing cardiac surgery, whether being overweight  
38 (BMI of 25-29.9) increases the risk remains unclear as some studies found a positive association<sup>[12, 13]</sup>, while  
39 other studies did not<sup>[14-16]</sup>. Several well-designed meta-analyses based on a categorical or continuous model  
40 found an increased risk of POAF among individuals with obesity. These studies provide valuable  
41 information. However, these studies have several limitations. First, it is arguable that the use of a categorical  
42 model in meta-analyses has the risk of reducing power and precision by dividing the exposure into several  
43 groups<sup>[17]</sup>. Furthermore, the use of a continuous model might not detect the dose-specific association as  
44 several studies have also reported a “U”-shaped association between BMI and POAF<sup>[14, 18]</sup>. Second, some  
45 important factors associated with the risk of AF, such as chronic obstructive pulmonary disease (COPD),  
46 smoking, diabetes, and left atrial diameter (LAD), were reported to have a higher prevalence in individuals  
47 with obesity and those undergoing cardiac surgery. Nevertheless, a univariate meta-analysis cannot account  
48 for such confounders in the relationship between obesity and POAF. Third, to date, no comprehensive study  
49 has quantitatively assessed the exposure-effect relationship between BMI and POAF. The shape of the  
50 exposure-effect curve and whether being overweight increases the risk of POAF are still unclear. Moreover,  
51 several studies have also assessed the association between abdominal measures of adiposity, such as waist  
52 circumference, and advocated that these measures are a better index for predicting the incidence of POAF<sup>[14,</sup>  
53 <sup>19]</sup>.

54 Thus, we conducted a dose-response meta-analysis to quantify the association among body mass index,  
55 abdominal adiposity and the incidence of POAF.

## 56 Methods

57 This study was performed according to Preferred Reporting Items for Systematic reviews and

## 58 Meta-Analyses

59 Statement (PRISMA) guidelines<sup>[20]</sup> (**Table S1 in Supplemental Material**). All prospective studies,  
60 including RCTs and observational studies (cohort and nested case-control studies), reporting data regarding  
61 BMI and POAF were considered eligible for this systematic review. A systematic literature search was  
62 conducted using the Cochrane Library, PubMed, and EMBASE databases through December 2019. Two  
63 researchers (X.L. and Z-C.T.) independently performed the entire process of this exposure-effect  
64 meta-analysis from the literature search and selection to the data analysis. **Table S2 in Supplemental**  
65 **Material** provides a detailed description of the search strategy. All discrepancies were resolved through  
66 discussion with each other or consultation with a 3rd reviewer (H-K). We used the method described by  
67 Greenland and Longnecker<sup>[21]</sup> to estimate the study-specific linear trends and 95% CIs from the natural logs  
68 of the RRs and CIs across categories of BMI. The robust error meta-regression method was used to fit the  
69 nonlinear exposure-effect meta-analysis of BMI and POAF<sup>[22, 23]</sup>. All statistical analyses were performed  
70 using Review Manager (RevMan) version 5.3 (The Cochrane Collaboration 2014; Nordic Cochrane Center  
71 Copenhagen, Denmark) and Stata software (Version 14.0, Stata Corp LP, College Station, Texas, USA).  
72  $P < 0.05$  was considered statistically significant. The full details of the literature search strategy, study  
73 selection criteria, quality assessment, and statistical analysis are reported in the **Supplemental Methods in**  
74 **the Supplemental Material**. Additionally, this study was registered with PROSPERO (international  
75 prospective register of systematic reviews) under registration number CRD42019128770.

76

## 77 Results

### 78 Study selection

79 As shown in **Figure 1**, a total of 655 articles were initially identified, including 189 duplicates. After  
80 screening the titles and abstracts, 55 articles remained for the detailed full-text screening. All articles  
81 excluded after the full-text review are listed in **Table S3 in the Supplemental Material**. Finally, a total of  
82 30 studies were included. Thirty-two studies were included in the analysis of BMI, and 2 studies were  
83 included in the analysis of waist circumference. Seventeen articles reported AF after CABG, two articles  
84 reported AF after valve surgery, and eight articles reported the total AF after various cardiac surgeries.

### 85 Study characteristics and quality

86 **Table 1** shows the detailed characteristics of the included studies. Overall, these studies were published  
87 between 1996 and 2017. Among the included studies, the sample sizes ranged from 92 to 18,517 with a total  
88 of 139,302 individuals. The mean age varied from 56 to 68 years. Fourteen studies<sup>[9, 11, 13, 14, 16, 18, 24-31]</sup> were

39 from North America (the US and Canada), six studies<sup>[15, 32-36]</sup> were from Europe, two studies<sup>[10, 12]</sup> were from  
30 Oceania, and two studies<sup>[19, 37]</sup> were from Asia. Sixteen studies reported the BMI as a categorical variable,  
31 eight studies reported the BMI as a continuous variable, and two articles reported the BMI as both a  
32 categorical and continuous variable.

33 The overall reporting quality of the included studies was acceptable. All included studies obtained an  
34 NOS $\geq$ 6 points (**Table S4 in Supplemental Material**).

### 35 **Categorical analysis of the effect of BMI on POAF**

36 Fourteen studies grouped the BMI categories according to the World Health Organization criteria; however,  
37 only six articles (seven cohorts)<sup>[14, 16, 18, 19, 28, 30]</sup> reported using normal BMI as the reference group. As shown  
38 in **Figure 2**, being underweight was not associated with an increased risk of POAF (RR: 1.44, 95% CI:  
39 0.90–2.30;  $I^2=29\%$ ). In contrast, obesity significantly increased the risk of POAF (RR: 1.39, 95% CI:  
40 1.21–1.61;  $I^2=41\%$ ). Interestingly, the risk of POAF seemed to gradually increase with the obesity stage (RR  
41 of 1.29 for stage I obesity, 1.34 for stage II obesity, and 1.64 for stage III obesity).

### 42 **Dose-response analysis of the effect of BMI on POAF**

43 Thirty studies<sup>[9-16, 18, 19, 24-30, 32, 33, 35-46]</sup> involving 32,546 cases/139,302 patients were included in the  
44 dose-response analysis of BMI and POAF. The summary RR for a 5-unit increase in BMI was 1.09 (95% CI:  
45 1.05-1.12) with each weight not exceeding 7%. Significant heterogeneity ( $I^2=83\%$ ) (Figure 3) was found  
46 across the studies. In the sensitivity analyses excluding the largest weighted study, the pooled RR ranged  
47 from 1.09 (95% CI: 1.05-1.12) to 1.10 (95% CI: 1.06-1.14,  $I^2=78\%$ ). Additionally, the pooled results were  
48 not significantly changed when omitting one study at a time (**Figure S1 in the Supplemental Material**).  
49 There was no evidence of nonlinearity ( $P=0.44$ ) in the relationship between BMI and POAF (**Figure 4**). The  
50 nonlinear curve showed that obesity, but not overweight, significantly increased the risk of POAF compared  
51 with the patients with a normal BMI (**Figure 4**). **Table 3** displays the RR estimates from the nonlinear  
52 exposure-effect analysis of selected BMI values; these values were derived from the nonlinear figures.

53 We further performed a subgroup analysis by type of cardiac operation. Seventeen articles<sup>[13-16, 18, 24, 25, 28, 29,</sup>  
54 <sup>34, 35, 39, 42]</sup> reported the association in coronary artery bypass graft (CABG), two articles<sup>[19, 36]</sup> reported the  
55 association in valve surgery, and seven articles<sup>[9-13, 30, 31]</sup> reported the association in combined types of  
56 cardiac surgery. The summary RRs for a 5-unit increment in BMI in the CABG group, valve surgery group,  
57 and combined cardiac surgery group were 1.216 (95% CI: 1.21-1.219,  $I^2=80\%$ ), 1.34 (95% CI: 0.81-2.22,  
58  $I^2=84\%$ ), and 1.13 (95% CI: 1.06-1.20,  $I^2=79\%$ ), respectively (**Table 2**). Moreover, there was some evidence  
59 of a J-shaped relationship between POAF in the CABG group ( $P_{\text{nonlinearity}}=0.0027$ ), with the risk of POAF

20 significantly increasing at a BMI of 30 and rising steeply at higher BMI levels. However, the curve was  
21 much flatter in the combined cardiac surgery group (**Figure 5A-B**).

## 22 **Waist circumference obesity and POAF**

23 Two prospective studies<sup>[14, 39]</sup> reported an analysis of the association between waist circumference and the  
24 risk of AF after CABG and included 536 cases among 2,691 participants. Abdominal obesity was associated  
25 with an increased risk of POAF (RR: 1.55, 95% CI: 1.26-1.90) with no evidence of heterogeneity ( $I^2=0\%$ )  
26 (**Figure 6**).

## 27 **Subgroup and meta-regression analyses**

28 We conducted a subgroup analysis and a meta-regression by patient characteristics, such as age, region,  
29 confounding factors and potential intermediate factors. We found some indication of a stronger relationship  
30 between BMI and POAF among the studies with higher NOS scores (**Table 2**). As shown in **Table 2**, the  
31 positive association between BMI and the risk of POAF persisted in almost all subgroup analyses by age,  
32 region, sample size, study quality and adjustment for clinical confounding factors (e.g., diabetes,  
33 hypertension, and age), and there was no evidence of heterogeneity among any of these subgroups in the  
34 meta-regression analyses.

## 35 **Publication bias**

36 A possible lack of publication bias was indicated by Egger's and Begg's tests and the funnel plot (**Figure**  
37 **S2-4 in the Supplemental Material**).

## 38 **Discussion**

39 This study presents the first dose-response analysis of the relationship between adiposity and the risk of  
40 POAF. By combining 30 prospective studies involving 32,546 cases among 139,302 patients, we found a 9%  
41 increased risk of POAF per a 5-unit increase in BMI. Both the categorical analysis and exposure-effect  
42 model showed that obesity, but not being overweight or underweight, significantly increased the risk of  
43 POAF. Consistently, in the subgroup analysis of CABG, a somewhat J-shaped association was found as the  
44 risk significantly increased at a BMI of 30 and steeply rose at higher BMI levels. Finally, to the best of our  
45 knowledge, we are also the first to confirm the association between abdominal adiposity and the risk of AF  
46 in patients after cardiac surgery. These findings provide a compressive overview of the association between  
47 adiposity and POAF.

48 Although the relationship between obesity and the risk of POAF is not new, the exposure-effect relationship  
49 between BMI and POAF is still unclear, and the associations between overweight and the risk of POAF have

50 not been comprehensively assessed. Several prospective cohort studies<sup>[47, 48]</sup> found that being overweight  
51 significantly increased the risk of new onset AF; however, an independent positive relationship in POAF  
52 was not confirmed in several large prospective long-term follow-up cohorts after adjusting for clinical  
53 confounding variables<sup>[49, 50]</sup> (e.g., the Framingham Heart Study). Consistently, our categorical analysis and  
54 exposure-effect analysis uniformly showed that being overweight did not statically increase the risk of  
55 POAF. This result was unsurprising. First, as described by a previously published meta-analysis<sup>[51, 52]</sup>, the  
56 magnitude of the association between overall obesity and POAF is minimal, with an RR of 1.12-1.21.  
57 Consistently, our results also showed that the summary RR per 5 units of BMI was 9%, further suggesting  
58 that the real effect may even be very small in magnitude. Furthermore, the risk factors for POAF are  
59 complicated and mainly include transient perioperative factors and a pre-existing condition<sup>[53]</sup>. A large  
60 cohort study<sup>[54]</sup> found that the repeat recurrence of AF in cardiac surgery was higher than that in noncardiac  
61 operations, supporting that the role of transient factors (e.g., cross-clamp time and intra-aortic balloon pump)  
62 is more significant than that of a pre-existing condition (e.g., obesity or hypertension). Thus, we speculated  
63 that the pathological condition caused by overweight might be compensable and insufficient to trigger  
64 POAF independently.

55 The association between obesity and atrial fibrillation is not new in the field of cardiac surgery. However,  
56 due to the limitations of univariate analyses and lack of evaluation of other clinical factors or potential  
57 intermediates in previously published meta-analyses<sup>[51, 52]</sup>, the multitude of other factors and potential  
58 intermediates (e.g., age, smoking, obstructive sleep apnea (OSA), COPD, and hypertension) that may also  
59 affect the association between obesity and POAF incidence are still unclear. For example, the association of  
60 hypertension with POAF was slightly stronger than that of obesity and was more common in cardiac surgery  
61 patients with obesity. Stamou et al<sup>[30]</sup> found that 87% of patients with obesity had preoperative hypertension  
62 compared to 75% of patients without obesity in a cohort of 2,465 patients undergoing cardiac surgery.  
63 Another important intermediate factor is lung disease. For example, a study reported that the incidence of  
64 POAF increases with surgical invasiveness from an RR of 2.26 after mediastinal surgery to 8.90 in patients  
65 undergoing pneumonectomy, suggesting that a strong association exists between lung disease and POAF<sup>[55]</sup>.  
66 More consistently, several studies also showed that COPD was strongly linked to the incidence and  
67 progression of AF<sup>[56, 57]</sup>. Another study also showed that POAF was associated primarily with metabolic  
68 syndrome (OR, 2.36; p=0.02) rather than BMI in a younger population<sup>[16]</sup>. Our results showed that the  
69 positive association persisted in almost all subgroup analyses by age, region, number of cases, and study  
70 quality and after adjustment for these abovementioned factors, indicating an independent association

31 between obesity and the risk of POAF.

32 Notably, not all important clinical confounding factors or potential intermediates were assessed in the  
33 present study. For example, OSA was common in patients with obesity and sharply increased with BMI. The  
34 link between OSA and new onset incident AF has been confirmed<sup>[58]</sup>. Various studies have found that OSA is  
35 independently associated with an increased risk of AF following CABG<sup>[59, 60]</sup>. Thus, some authors have  
36 suggested that the positive correlation between obesity and POAF can be explained by OSA. Similarly, LAD  
37 enlargement, which is another pathological condition that often coexisted with obesity, was also identified as  
38 a crucial factor that independently contributes to the incidence of AF<sup>[61]</sup>. However, few included studies  
39 adjusted for OSA or enlarged LAD, and even fewer studies examined the direct link among OSA, LAD and  
40 increased POAF. Therefore, the role of OSA and LAD in the relationship between BMI and POAF is still  
41 unclear and needs to be further studied.

42 Notably, BMI is commonly used because it is simple to apply and inexpensive. However, the utility of BMI  
43 in evaluating obesity has been criticized because it is indistinguishable from fat. In our results, body fat  
44 measured by waist circumference increased the risk of POAF by 55%. This value was much greater than that  
45 previously reported in the association between obesity and POAF and the value observed in our study.  
46 Although the included study was limited, some authors have highlighted the importance of using multiple  
47 measures, such as visceral obesity, in the risk assessment of POAF<sup>[14]</sup>.

48 Previous studies only analyzed the association between obesity and the POAF incidence in total cardiac  
49 surgery<sup>[51, 52]</sup>. The potential difference in the impact of obesity on cardiac surgery has not been examined. In  
50 the present study, a significant difference was found in the cardiac surgery subgroup analysis (P of subgroup  
51 difference=0.007). Furthermore, a nonlinear expose-effect relationship between BMI and POAF in CABG  
52 was observed, with a sharper and steeper curve. In contrast, the exposure-effect curve of the combined types  
53 of cardiac surgery subgroup (CABG and valve surgery) was much flatter. This result suggests that the curve  
54 of POAF after valve surgery was much lower than that in the CABG group. This result was further  
55 reinforced by the linear analysis, which showed a nonsignificant RR (P=0.25) per a 5-unit increase in BMI.  
56 However, we should interpret these results with caution. The number of studies reporting obesity and POAF  
57 in valve surgery was limited, and the pooled RR had substantial heterogeneity. Moreover, in another  
58 cohort<sup>[13]</sup> consisting of 16% valve surgery and 85% CABG, similar RRs were found across different obesity  
59 groups in the analysis between total surgery and isolated CABG only. Therefore, the impact of obesity on  
60 CABG and valve surgery is still unclear and should be further studied.

61 The effect of POAF on secondary outcomes was not assessed in the present study. Previous studies have



12 observed an “obesity paradox” in the outcomes of patients undergoing cardiac surgery, with individuals  
13 affected by overweight and class I and II obesity having lower mortality<sup>[30, 62]</sup>. However, recent studies using  
14 dose-response methods and more compressive meta-analyses did not find any protective effect or higher  
15 mortality among patients with extreme obesity<sup>[63]</sup>. Consistently, another meta-analysis found higher major  
16 morbidity and total hospital costs in patients with obesity undergoing cardiac surgery<sup>[31]</sup>. Our results further  
17 support this observation of a lack of an obesity paradox; we found that POAF increased with increasing BMI,  
18 and morbidly increased POAF by 40% and 120% in the total cardiac surgery and CABG subgroups,  
19 respectively. POAF independently predicted stroke<sup>[64]</sup> and long-term mortality. Thus, regarding obesity,  
20 especially morbid obesity, the risk of POAF should be carefully evaluated before cardiac surgery, and  
21 specific interventions for the prevention of POAF should be considered. To date, purposeful weight loss has  
22 been shown to reverse many changes in cardiac performance and morphology associated with obesity and  
23 the incidence and burden of AF<sup>[65, 66]</sup>. However, weight loss might not be as prevalent in the cardiac surgery  
24 subgroup because most CABG procedures are emergent and unexpected or conducted in patients with poor  
25 cardiac function (patients receiving valve replace). Alternatively, the administration of certain medications  
26 was the most commonly used therapy for POAF prophylaxis. Among these medications,  $\beta$ -blockers,  
27 amiodarone, and sotalol were proven to be effective against POAF after cardiac surgery.  $\beta$ -blockers were  
28 uniformly recommended by the guidelines (class I recommendation)<sup>[67-69]</sup>. According to a Cochrane review  
29 meta-analysis,  $\beta$ -blockers significantly reduce the incidence of POAF by 67%<sup>[70]</sup>, and the initiation or  
30 continuation of  $\beta$ -blockers is strongly recommended. Amiodarone is recommended for patients with  
31 contraindications to  $\beta$ -blockers or (alone or in addition to  $\beta$ -blocker therapy) those who are at a high risk of  
32 POAF. Sotalol is recommended for general POAF prophylaxis (AHA/ACC/HRS class IIb  
33 recommendation)<sup>[53]</sup>. An RCT found that sotalol was equally effective for prophylaxis of POAF as  
34 amiodarone<sup>[71]</sup>. Moreover, sotalol was even more effective than standard  $\beta$ -blocker therapy in patients  
35 undergoing cardiac surgery<sup>[71]</sup>. Notably, obesity often coexists with diabetes, an older age, congestive heart  
36 failure, and other risk factors, and the risk of POAF might increase by multiple times as a result. Thus, a  
37 combination of  $\beta$ -blockers and amiodarone can be considered for POAF prophylaxis in these high-risk  
38 patients.

39 Finally, our findings have important clinical implications for the prevention of POAF as a previous  
40 meta-analysis analyzed BMI but did not include other measures of fat in relation to the risk of POAF, and  
41 prior studies did not assess the dose-response relationship between BMI and POAF in as great detail as the  
42 present analysis. In addition, our results show that obesity was associated with an increased risk of POAF in

43 studies from Europe, North America, and Oceania, suggesting that the prevention of obesity is essential  
44 across populations. The current analysis suggests that both general and abdominal adiposity (waist  
45 circumference) measures are related to an increased risk of POAF and that being relatively slim, as assessed  
46 by BMI and other adiposity measures, may confer the lowest risk of POAF.

## 47 **Strengths and limitations**

48 Our meta-analysis has several strengths. First, all included studies were designed as prospective studies,  
49 avoiding recall bias and reducing the possibility of selection bias. Second, this meta-analysis included a  
50 large number of cohort studies (30 studies, N=139,302) with BMI reported as either a categorical or  
51 continuous variable, providing strong statistical power to detect moderate associations. The detailed  
52 exposure–effect analyses clarified the shape of the exposure–effect relationship. Third, the positive  
53 association between BMI and POAF persisted in different subgroups (e.g., age or region) and after adjusting  
54 for confounding factors, confirming the robustness of our findings.

55 Our study inevitably has several limitations. First, this meta-analysis included observational studies, and bias  
56 was not entirely avoided. Measured and unmeasured confounding variables might have influenced our  
57 results. However, this limitation cannot be mitigated by the large number of studies and adjustments for  
58 coexistent confounding factors in all included studies. Second, significant heterogeneity ( $I^2=83\%$ ) was  
59 observed across the included studies, which might have been derived from between-study differences, such  
60 as differences in study design, basic patient characteristics, and analytical strategies. Third, we did not  
61 analyze the long-term POAF incidence since most studies only reported the incidence of POAF during the  
62 length of hospitalization. However, most POAF has a peak incidence between days 2 and 4 after surgery<sup>[53]</sup>,  
63 especially during the first postoperative week. Fourth, we did not assess the effect of BMI on secondary  
64 outcomes in patients undergoing a cardiac operation, such as stroke and death, which have been thoroughly  
65 studied in previous studies<sup>[31, 63]</sup>.

66 In conclusion, based on the current evidence, our findings are the first to show that obesity and abdominal  
67 adiposity are independently associated with an increased risk of POAF. Being underweight or overweight  
68 might not significantly increase the POAF risk. The magnitude of the effect of obesity on AF in patients  
69 undergoing valve surgery might be small and needs to be further confirmed.

## 70 **Sources of funding**

71 This work was supported in part by the National Natural Science Foundation of China (No. 81760050,  
72 81760048) and the Jiangxi Provincial Natural Science Foundation for Youth Scientific Research (No.

73 20192ACBL21037).

## 74 **Conflicts of interest**

75 All authors declare that they have no conflicts of interest.

## 76 **Author contributions**

77 X.L. was responsible for the entire project and revised the draft. X.L. and M-L.L. performed the systematic  
78 literature review and drafted the first version of the manuscript. All authors participated in the interpretation  
79 of the results and prepared the final version of the manuscript.

### 30 **Figure legends**

31 **Figure 1. Overview of the research strategy. RR, risk ratio.**

32 **Figure 2. Forest plot of the categorical analysis of the impact of body mass index on POAF.**

33 POAF: postoperative atrial fibrillation after cardiac surgery

34 **Figure 3. Forest plot of the association between body mass index and POAF and exposure-effect analysis,  
35 per 5 units.**

36 POAF: postoperative atrial fibrillation after cardiac surgery

37 **Figure 4. Nonlinear exposure-effect analysis of body mass index and POAF. The solid and dashed lines  
38 represent the estimated relative risk and the 95% confidence interval, respectively.**

39 POAF: postoperative atrial fibrillation after cardiac surgery

40 **Figure 5. Body mass index and POAF stratified by types of cardiac surgery and nonlinear  
31 exposure-effect analysis. The solid and dashed lines represent the estimated relative risk and the 95%  
32 confidence interval, respectively. A: coronary artery bypass graft; B: combined cardiac surgery.**

33 POAF: postoperative atrial fibrillation after cardiac surgery

34 **Figure 6. Forest plot of the impact of waist obesity on POAF.**

35 POAF: postoperative atrial fibrillation after cardiac surgery

36

## 37 **Reference**

38 [1] Vogli RD, Kouvonen A, Elovainio M, Marmot M. Economic globalization, inequality and body mass index: a cross-national  
39 analysis of 127 countries. *Critical Public Health*. 2014;24:7-21.

40 [2] Jayedi A, Rashidy-Pour A, Khorshidi M, Shab-Bidar S. Body mass index, abdominal adiposity, weight gain and risk of  
41 developing hypertension: a systematic review and dose–response meta-analysis of more than 2.3 million participants. *Obesity*

- 32 reviews. 2018;19:654-67.
- 33 [3] Milajerdi A, Djafarian K, Shab-Bidar S, Speakman J. Pre-and post-diagnosis body mass index and heart failure mortality: a  
34 dose–response meta-analysis of observational studies reveals greater risk of being underweight than being overweight. *Obesity*  
35 reviews. 2019;20:252-61.
- 36 [4] Aune D, Sen A, Prasad M, Norat T, Janszky I, Tonstad S, et al. BMI and all cause mortality: systematic review and non-linear  
37 dose-response meta-analysis of 230 cohort studies with 3.74 million deaths among 30.3 million participants. *BMJ*.  
38 2016;353:i2156.
- 39 [5] Guh DP, Zhang W, Bansback N, Amarsi Z, Birmingham CL, Anis AH. The incidence of co-morbidities related to obesity and  
40 overweight: a systematic review and meta-analysis. *BMC public health*. 2009;9:88.
- 41 [6] Rahmani J, Kord-Varkaneh H, Hekmatdoost A, Thompson J, Clark C, Salehisahlabadi A, et al. Body mass index and risk of  
42 inflammatory bowel disease: A systematic review and dose-response meta-analysis of cohort studies of over a million  
43 participants. *Obesity Reviews*. 2019.
- 44 [7] Hennessy M, Heary C, Laws R, Rhoon L, Toomey E, Wolstenholme H, et al. The effectiveness of health professional-delivered  
45 interventions during the first 1000 days to prevent overweight/obesity in children: A systematic review. *Obesity Reviews*.  
46 2019;20:1691-707.
- 47 [8] Mitchell LB, Committee CAFG. Canadian Cardiovascular Society atrial fibrillation guidelines 2010: prevention and treatment of  
48 atrial fibrillation following cardiac surgery. *Canadian Journal of Cardiology*. 2011;27:91-7.
- 49 [9] Engelman DT, Adams DH, Byrne JG, Aranki SF, Collins JJ, Couper GS, et al. Impact of body mass index and albumin on  
50 morbidity and mortality after cardiac surgery. *The Journal of Thoracic and Cardiovascular Surgery*. 1999;118:866-73.
- 51 [10] Bramer S, van Straten AH, Soliman Hamad MA, Berrekouw E, van den Broek KC, Maessen JG. Body mass index predicts  
52 new-onset atrial fibrillation after cardiac surgery. *Eur J Cardiothorac Surg*. 2011;40:1185-90.
- 53 [11] Melduni RM, Suri RM, Seward JB, Bailey KR, Ammash NM, Oh JK, et al. Diastolic dysfunction in patients undergoing cardiac  
54 surgery: a pathophysiological mechanism underlying the initiation of new-onset post-operative atrial fibrillation. *J Am Coll*  
55 *Cardiol*. 2011;58:953-61.
- 56 [12] Yap CH, Zimmet A, Mohajeri M, Yui M. Effect of obesity on early morbidity and mortality following cardiac surgery. *Heart*  
57 *Lung Circ*. 2007;16:31-6.
- 58 [13] Zacharias A, Schwann TA, Riordan CJ, Durham SJ, Shah AS, Habib RH. Obesity and risk of new-onset atrial fibrillation after  
59 cardiac surgery. *Circulation*. 2005;112:3247-55.
- 60 [14] Girerd N, Pibarot P, Fournier D, Daleau P, Voisine P, O'Hara G, et al. Middle-aged men with increased waist circumference and  
61 elevated C-reactive protein level are at higher risk for postoperative atrial fibrillation following coronary artery bypass grafting  
62 surgery. *Eur Heart J*. 2009;30:1270-8.
- 63 [15] Reeves BC, Ascione R, Chamberlain MH, Angelini GD. Effect of body mass index on early outcomes in patients undergoing  
64 coronary artery bypass surgery. *Journal of the American College of Cardiology*. 2003;42:668-76.
- 65 [16] Echahidi N, Mohty D, Pibarot P, Despres JP, O'Hara G, Champagne J, et al. Obesity and metabolic syndrome are independent  
66 risk factors for atrial fibrillation after coronary artery bypass graft surgery. *Circulation*. 2007;116:1213-9.
- 67 [17] Bennette C, Vickers A. Against quantiles: Categorization of continuous variables in epidemiologic research, and its  
68 discontents. *BMC Medical Research Methodology*,12,1(2012-02-29). 2012;12:21.
- 69 [18] Sun X, Boyce SW, Hill PC, Bafi AS, Xue Z, Lindsay J, et al. Association of body mass index with new-onset atrial fibrillation  
70 after coronary artery bypass grafting operations. *Ann Thorac Surg*. 2011;91:1852-8.
- 71 [19] Gao M, Sun J, Young N, Boyd D, Atkins Z, Li Z, et al. Impact of Body Mass Index on Outcomes in Cardiac Surgery. *J*  
72 *Cardiothorac Vasc Anesth*. 2016;30:1308-16.
- 73 [20] Moher D, Liberati A, Tetzlaff J, Altman DG. The PRISMA Group. Preferred reporting items for systematic reviews and

- 44 meta-analyses: the PRISMA Statement. *Open Medicine*. 2009;3:e123-30.
- 45 [21] Greenland S. Quantitative methods in the review of epidemiologic literature. *Epidemiologic Reviews*. 1987;9:1-30.
- 46 [22] Doi SAR, Sar D. The robust error meta-regression method for dose-response meta-analysis.
- 47 [23] Zhang C, Jia P, Yu L, Xu C. Introduction to methodology of dose-response meta-analysis for binary outcome: With application  
48 on software. *J Evid Based Med*. 2018.
- 49 [24] Alam M, Siddiqui S, Lee V-V, Elayda MA, Nambi V, Yang EY, et al. Isolated Coronary Artery Bypass Grafting in Obese  
50 Individuals. *Circulation Journal*. 2011;75:1378-85.
- 51 [25] Efirid JT, Gudimella P, O'Neal WT, Griffin WF, Landrine H, Kindell LC, et al. Comparison of Risk of Atrial Fibrillation in Black  
52 Versus White Patients After Coronary Artery Bypass Grafting. *Am J Cardiol*. 2016;117:1095-100.
- 53 [26] El-Chami MF, Kilgo PD, Elfstrom KM, Halkos M, Thourani V, Lattouf OM, et al. Prediction of new onset atrial fibrillation after  
54 cardiac revascularization surgery. *Am J Cardiol*. 2012;110:649-54.
- 55 [27] Moulton MJ, Creswell LL, Mackey ME, Cox JL, Rosenbloom M. Obesity is not a risk factor for significant adverse outcomes  
56 after cardiac surgery. *Circulation*. 1996;94:1187.
- 57 [28] Omer S, Cornwell LD, Bakshi A, Rachlin E, Preventza O, Rosengart TK, et al. Incidence, Predictors, and Impact of  
58 Postoperative Atrial Fibrillation after Coronary Artery Bypass Grafting in Military Veterans. *Tex Heart Inst J*. 2016;43:397-403.
- 59 [29] Pan W, Hindler K, Lee VV, Vaughn WK, Collard CD. Obesity in diabetic patients undergoing coronary artery bypass graft  
60 surgery is associated with increased postoperative morbidity. *Anesthesiology*. 2006;104:441-7.
- 61 [30] Stamou SC, Nussbaum M, Stiegel RM, Reames MK, Skipper ER, Robicsek F, et al. Effect of body mass index on outcomes after  
62 cardiac surgery: is there an obesity paradox? *Ann Thorac Surg*. 2011;91:42-7.
- 63 [31] Ghanta RK, LaPar DJ, Zhang Q, Devarkonda V, Isbell JM, Yarboro LT, et al. Obesity Increases Risk-Adjusted Morbidity,  
64 Mortality, and Cost Following Cardiac Surgery. *J Am Heart Assoc*. 2017;6.
- 65 [32] Brandt M, Harder K, Walluscheck KP, Schöttler J, Rahimi A, Möller F, et al. Severe obesity does not adversely affect  
66 perioperative mortality and morbidity in coronary artery bypass surgery. *European Journal of Cardio-Thoracic Surgery*.  
67 2001;19:662-6.
- 68 [33] Hakala T, Vanninen E, Hedman A, Hippeläinen M. Analysis of Heart Rate Variability does not Identify the Patients at Risk of  
69 Atrial Fibrillation after Coronary Artery Bypass Grafting. *Scandinavian Cardiovascular Journal*. 2009;36:167-71.
- 70 [34] Kuduvali M, Grayson A, Oo A, Fabri B, Rashid A. Risk of morbidity and in-hospital mortality in obese patients undergoing  
71 coronary artery bypass surgery. *European Journal of Cardio-Thoracic Surgery*. 2002;22:787-93.
- 72 [35] Perrier S, Meyer N, Hoang Minh T, Announe T, Bentz J, Billaud P, et al. Predictors of Atrial Fibrillation After Coronary Artery  
73 Bypass Grafting: A Bayesian Analysis. *The Annals of Thoracic Surgery*. 2017;103:92-7.
- 74 [36] Tosello F, Florens E, Caruba T, Lebeller C, Mimoun L, Milan A, et al. Atrial fibrillation at mid-term after bioprosthetic aortic  
75 valve replacement - implications for anti-thrombotic therapy. *Circ J*. 2015;79:70-6.
- 76 [37] Erdil N, Gedik E, Donmez K, Erdil F, Aldemir M, Battaloglu B, et al. Predictors of Postoperative Atrial Fibrillation after  
77 On-Pump Coronary Artery Bypass Grafting: Is Duration of Mechanical Ventilation Time a Risk Factor? *Annals of Thoracic and*  
78 *Cardiovascular Surgery*. 2014;20:135-42.
- 79 [38] Banach M, Goch A, Misztal M, Rysz J, Jaszewski R, Goch JH. Predictors of paroxysmal atrial fibrillation in patients undergoing  
80 aortic valve replacement. *J Thorac Cardiovasc Surg*. 2007;134:1569-76.
- 81 [39] Ivanovic B, Tadic M, Bradic Z, Zivkovic N, Stanisavljevic D, Celic V. The influence of the metabolic syndrome on atrial  
82 fibrillation occurrence and outcome after coronary bypass surgery: a 3-year follow-up study. *Thorac Cardiovasc Surg*.  
83 2014;62:561-8.
- 84 [40] Jidéus L, Blomström P, Nilsson L, Stridsberg M, Hansell P, Blomström-Lundqvist C. Tachyarrhythmias and triggering factors for  
85 atrial fibrillation after coronary artery bypass operations. *The Annals of Thoracic Surgery*. 2000;69:1064-9.
- 86 [41] Kinoshita T, Asai T, Suzuki T, Kambara A, Matsubayashi K. Preoperative hemoglobin A1c predicts atrial fibrillation after  
87 off-pump coronary bypass surgery. *Eur J Cardiothorac Surg*. 2012;41:102-7.
- 88 [42] Tadic M, Ivanovic B, Zivkovic N. Predictors of atrial fibrillation following coronary artery bypass surgery. *Medical Science*  
89 *Monitor*. 2011;17:CR48-CR55.
- 90 [43] Habib RH, Zacharias A, Schwann TA, Riordan CJ, Durham SJ, Shah A. Effects of obesity and small body size on operative and

- 31 long-term outcomes of coronary artery bypass surgery: a propensity-matched analysis. *Ann Thorac Surg*. 2005;79:1976-86.
- 32 [44] Hravnak M, Hoffman LA, Saul MI, Zullo TG, Whitman GR, Griffith BP. Predictors and impact of atrial fibrillation after isolated  
33 coronary artery bypass grafting. *Critical Care Medicine*. 2002;30:330.
- 34 [45] Kitahara H, Patel B, McCrorey M, Nisivaco S, Balkhy HH. Morbid Obesity Does not Increase Morbidity or Mortality in Robotic  
35 Cardiac Surgery. *Innovations (Phila)*. 2017;12:434-9.
- 36 [46] Orhan G, Bicer Y, Aka SA, Sargin M, Simsek S, Senay S, et al. Coronary artery bypass graft operations can be performed safely  
37 in obese patients. *Eur J Cardiothorac Surg*. 2004;25:212-7.
- 38 [47] Frost L, Hune LJ, Vestergaard P. Overweight and obesity as risk factors for atrial fibrillation or flutter: the Danish Diet, Cancer,  
39 and Health Study. *The American journal of medicine*. 2005;118:489-95.
- 40 [48] Wilhelmssen L, Rosengren A, Lappas G. Hospitalizations for atrial fibrillation in the general male population: morbidity and  
41 risk factors. *Journal of Internal Medicine*. 2001;5:382-9.
- 42 [49] Wang TJ, Parise H, Levy D, D'Agostino RB, Wolf PA, Vasan RS, et al. Obesity and the risk of new-onset atrial fibrillation. *Jama*.  
43 2004;292:2471-7.
- 44 [50] Murphy N, MacIntyre K, Stewart S, Hart C, Hole D, McMurray J. Long-term cardiovascular consequences of obesity: 20-year  
45 follow-up of more than 15 000 middle-aged men and women (the Renfrew-Paisley study). *European heart journal*.  
46 2006;27:96-106.
- 47 [51] Hernandez AV, Kaw R, Pasupuleti V, Bina P, Ioannidis JP, Bueno H, et al. Association between obesity and postoperative atrial  
48 fibrillation in patients undergoing cardiac operations: a systematic review and meta-analysis. *Ann Thorac Surg*. 2013;96:1104-16.
- 49 [52] Phan K, Khuong JN, Xu J, Kanagaratnam A, Yan TD. Obesity and postoperative atrial fibrillation in patients undergoing cardiac  
50 surgery: Systematic review and meta-analysis. *International Journal of Cardiology*. 2016;217:49-57.
- 51 [53] Dobrev D, Aguilar M, Heijman J, Guichard JB, Nattel S. Postoperative atrial fibrillation: mechanisms, manifestations and  
52 management. *Nat Rev Cardiol*. 2019;16:417-36.
- 53 [54] Lubitz SA, Yin X, Rienstra M, Schnabel RB, Walkey AJ, Magnani JW, et al. Long-term outcomes of secondary atrial fibrillation  
54 in the community: the Framingham Heart Study. *Circulation*. 2015;131:1648-55.
- 55 [55] Vaporciyan AA, Correa AM, Rice DC, Roth JA, Smythe W, Swisher SG, et al. Risk factors associated with atrial fibrillation after  
56 noncardiac thoracic surgery: analysis of 2588 patients. *The Journal of thoracic and cardiovascular surgery*. 2004;127:779-86.
- 57 [56] Grymonprez M, Vakaet V, Kavousi M, Stricker BH, Ikram MA, Heeringa J, et al. Chronic obstructive pulmonary disease and  
58 the development of atrial fibrillation. *International Journal of Cardiology*. 2019;276:118-24.
- 59 [57] Durheim MT, Holmes DN, Blanco RG, Allen LA, Chan PS, Freeman JV, et al. Characteristics and outcomes of adults with  
60 chronic obstructive pulmonary disease and atrial fibrillation. *Heart*. 2018;104:1850-8.
- 61 [58] Cadby G, McArdle N, Briffa T, Hillman DR, Simpson L, Knuihan M, et al. Severity of OSA is an independent predictor of  
62 incident atrial fibrillation hospitalization in a large sleep-clinic cohort. *Chest*. 2015;148:945-52.
- 63 [59] Qaddoura A, Kabali C, Drew D, van Oosten EM, Michael KA, Redfearn DP, et al. Obstructive sleep apnea as a predictor of  
64 atrial fibrillation after coronary artery bypass grafting: a systematic review and meta-analysis. *Canadian Journal of Cardiology*.  
65 2014;30:1516-22.
- 66 [60] van Oosten EM, Hamilton A, Petsikas D, Payne D, Redfearn DP, Zhang S, et al. Effect of preoperative obstructive sleep apnea  
67 on the frequency of atrial fibrillation after coronary artery bypass grafting. *The American journal of cardiology*. 2014;113:919-23.
- 68 [61] Tsang TS, Barnes ME, Bailey KR, Leibson CL, Montgomery SC, Takemoto Y, et al. Left atrial volume: important risk marker of  
69 incident atrial fibrillation in 1655 older men and women. *Mayo Clinic Proceedings: Elsevier*; 2001. p. 467-75.
- 70 [62] Mariscalco G, Wozniak MJ, Dawson AG, Serraino GF, Porter R, Nath M, et al. Body mass index and mortality among adults  
71 undergoing cardiac surgery: a nationwide study with a systematic review and meta-analysis. *Circulation*. 2017;135:850-63.
- 72 [63] Liu X, Xie L, Zhu W, Zhou Y. Association of body mass index and all-cause mortality in patients after cardiac surgery: A  
73 dose-response meta-analysis. *Nutrition*. 2020;72:110696.
- 74 [64] Lin M-H, Kamel H, Singer DE, Wu Y-L, Lee M, Ovbiagele B. Perioperative/Postoperative Atrial Fibrillation and Risk of  
75 Subsequent Stroke and/or Mortality: A Meta-Analysis. *Stroke*. 2019;50:1364-71.
- 76 [65] Middeldorp ME, Pathak RK, Meredith M, Mehta AB, Elliott AD, Mahajan R, et al. PREVENTion and regReSSive Effect of  
77 weight-loss and risk factor modification on Atrial Fibrillation: the REVERSE-AF study. *Europace*. 2018;20:1929-35.

- 38 [66] Lavie CJ, Pandey A, Lau DH, Alpert MA, Sanders P. Obesity and Atrial Fibrillation Prevalence, Pathogenesis, and Prognosis:  
39 Effects of Weight Loss and Exercise. *J Am Coll Cardiol*. 2017;70:2022-35.
- 40 [67] Andrade JG, Verma A, Mitchell LB, Parkash R, Leblanc K, Atzema C, et al. 2018 focused update of the Canadian  
41 Cardiovascular Society guidelines for the management of atrial fibrillation. *Canadian Journal of Cardiology*. 2018;34:1371-92.
- 42 [68] Fuster V. American College of Cardiology/American Heart Association Task Force on Practice Guidelines; European Society of  
43 Cardiology Committee for Practice Guidelines; European Heart Rhythm Association; Heart Rhythm Society. ACC/AHA/ESC 2006  
44 guidelines for the management of patients with atrial fibrillation: a report of the American College of Cardiology/American Heart  
45 Association Task Force on practice guidelines and the European Society of Cardiology Committee for practice guidelines (writing  
46 committee to revise the 2001 guidelines for the management of patients with atrial fibrillation): developed in collaboration with  
47 the European Heart Rhythm Association and the Heart Rhythm Society. *Circulation*. 2006;114:e257-e354.
- 48 [69] Kirchhof P, Benussi S, Kotecha D, Ahlsson A, Atar D, Casadei B, et al. 2016 ESC Guidelines for the management of atrial  
49 fibrillation developed in collaboration with EACTS. *Eur Heart J*. 2016;37:2893-962.
- 50 [70] Arsenault KA, Yusuf AM, Crystal E, Healey JS, Morillo CA, Nair GM, et al. Interventions for preventing post-operative atrial  
51 fibrillation in patients undergoing heart surgery. *Cochrane Database of Systematic Reviews*. 2013.
- 52 [71] Mooss AN, Wurdeman RL, Sugimoto JT, Packard KA, Hilleman DE, Lenz TL, et al. Amiodarone versus sotalol for the treatment  
53 of atrial fibrillation after open heart surgery: the Reduction in Postoperative Cardiovascular Arrhythmic Events (REDUCE) trial.  
54 *American Heart Journal*. 2004;148:641-8.
- 55

Identification

Screening

Eligibility

Included

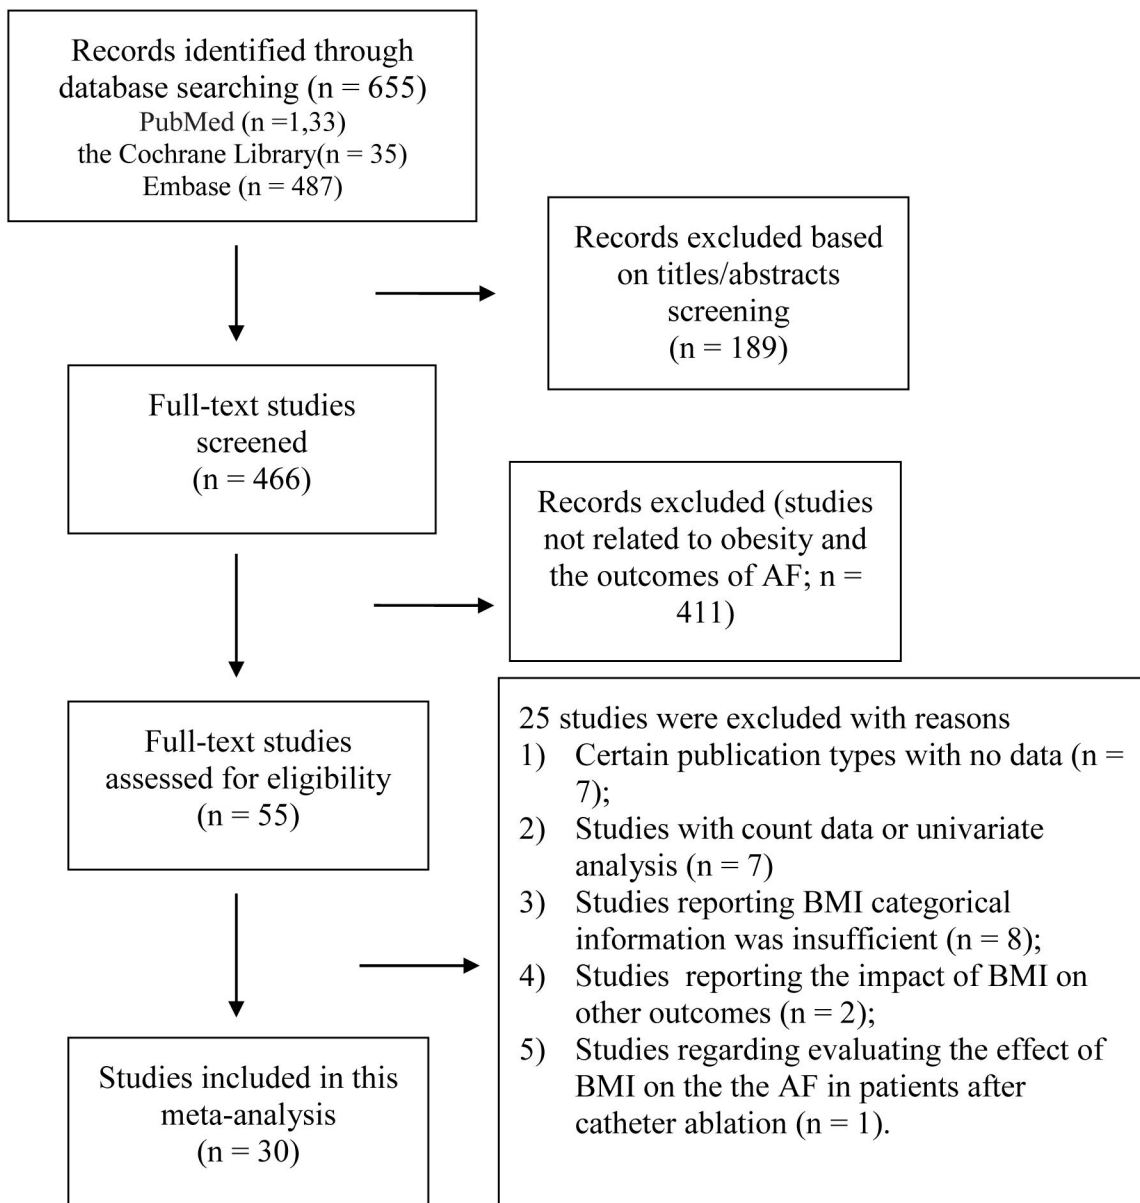



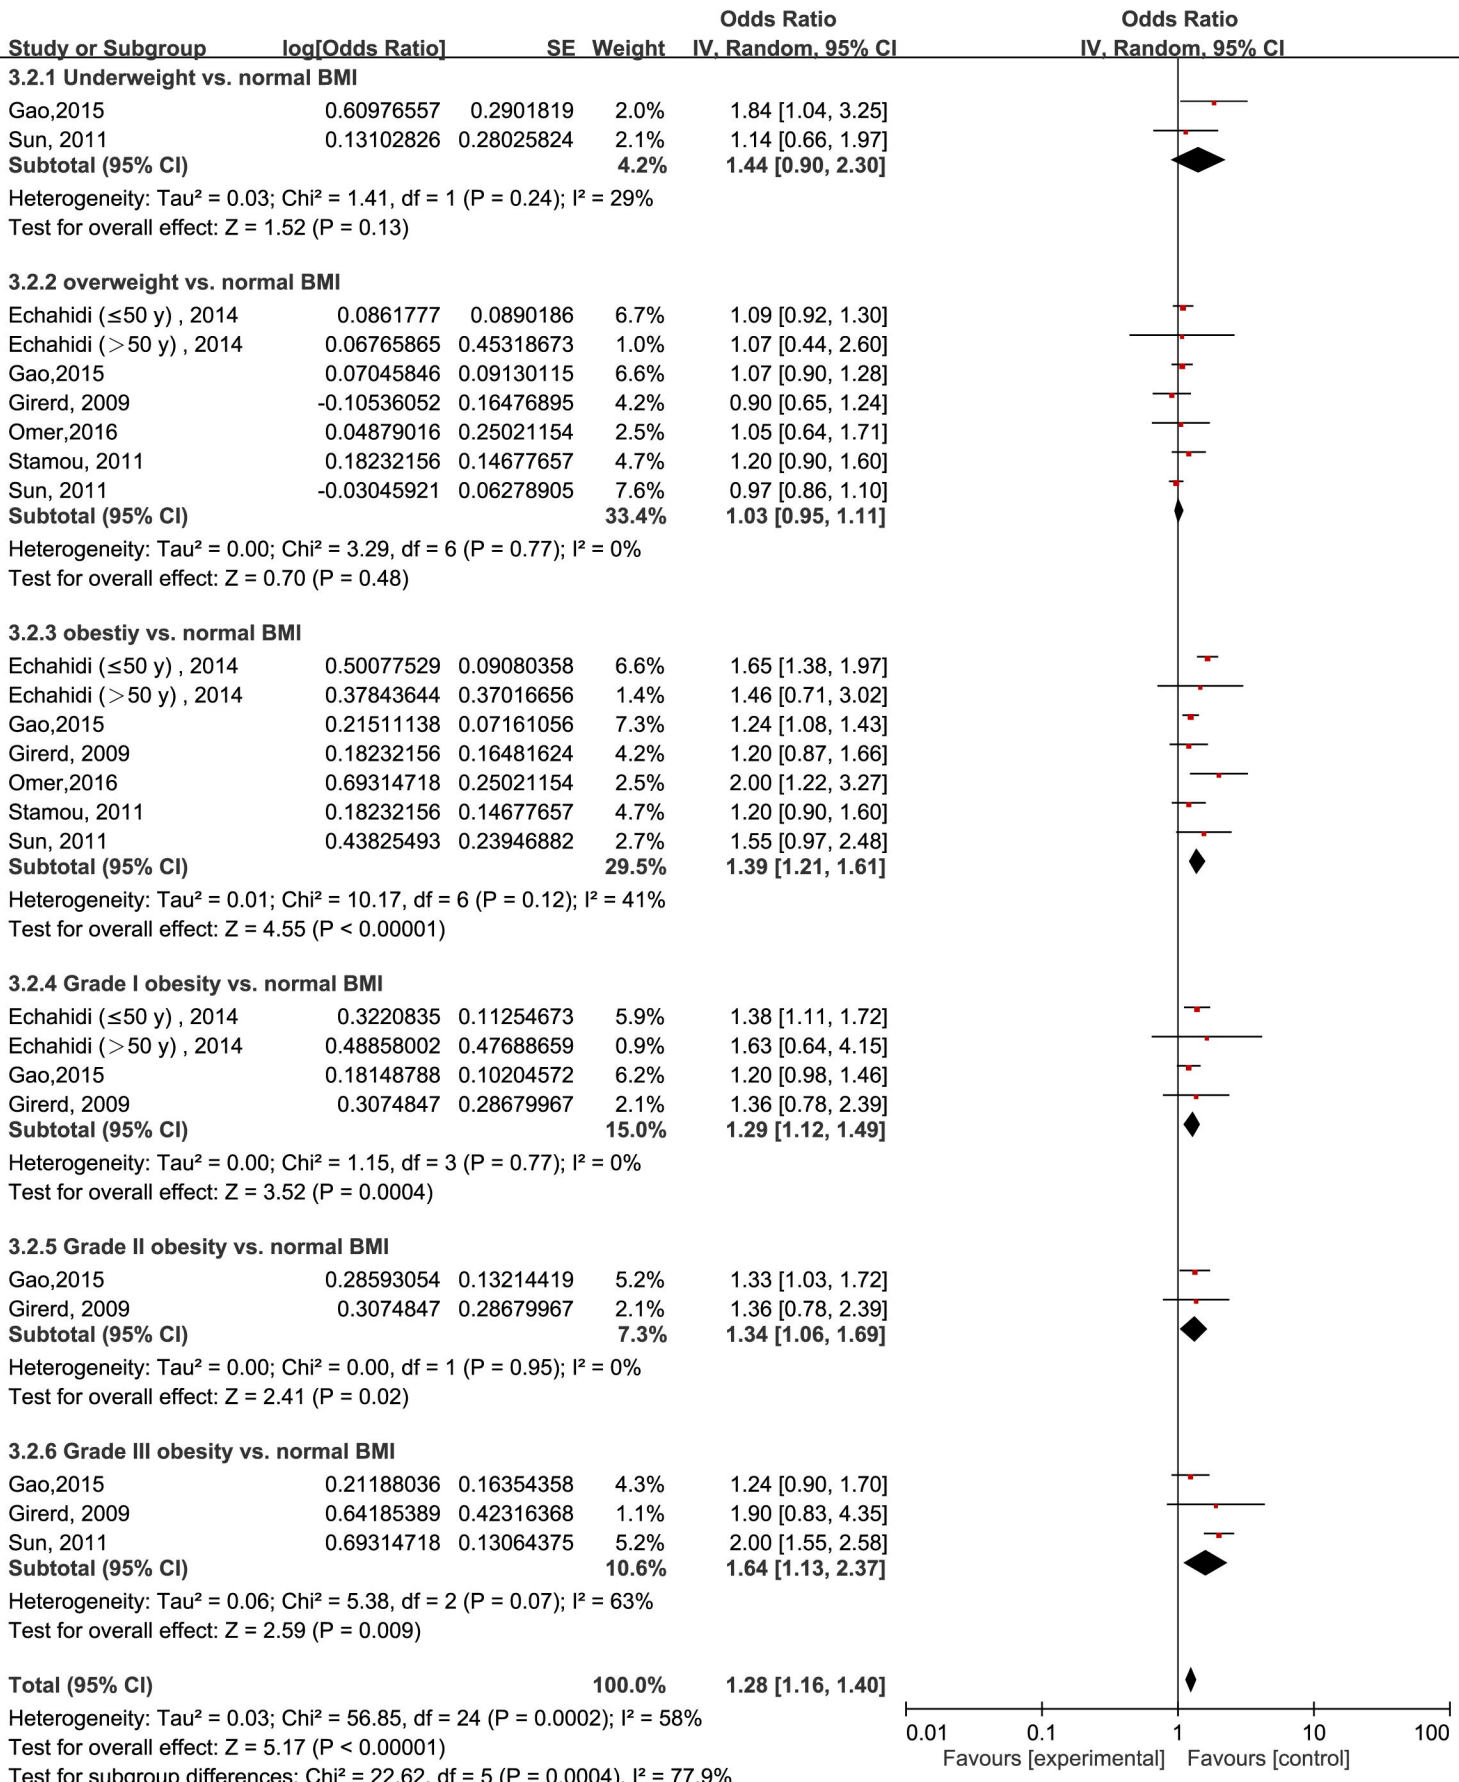

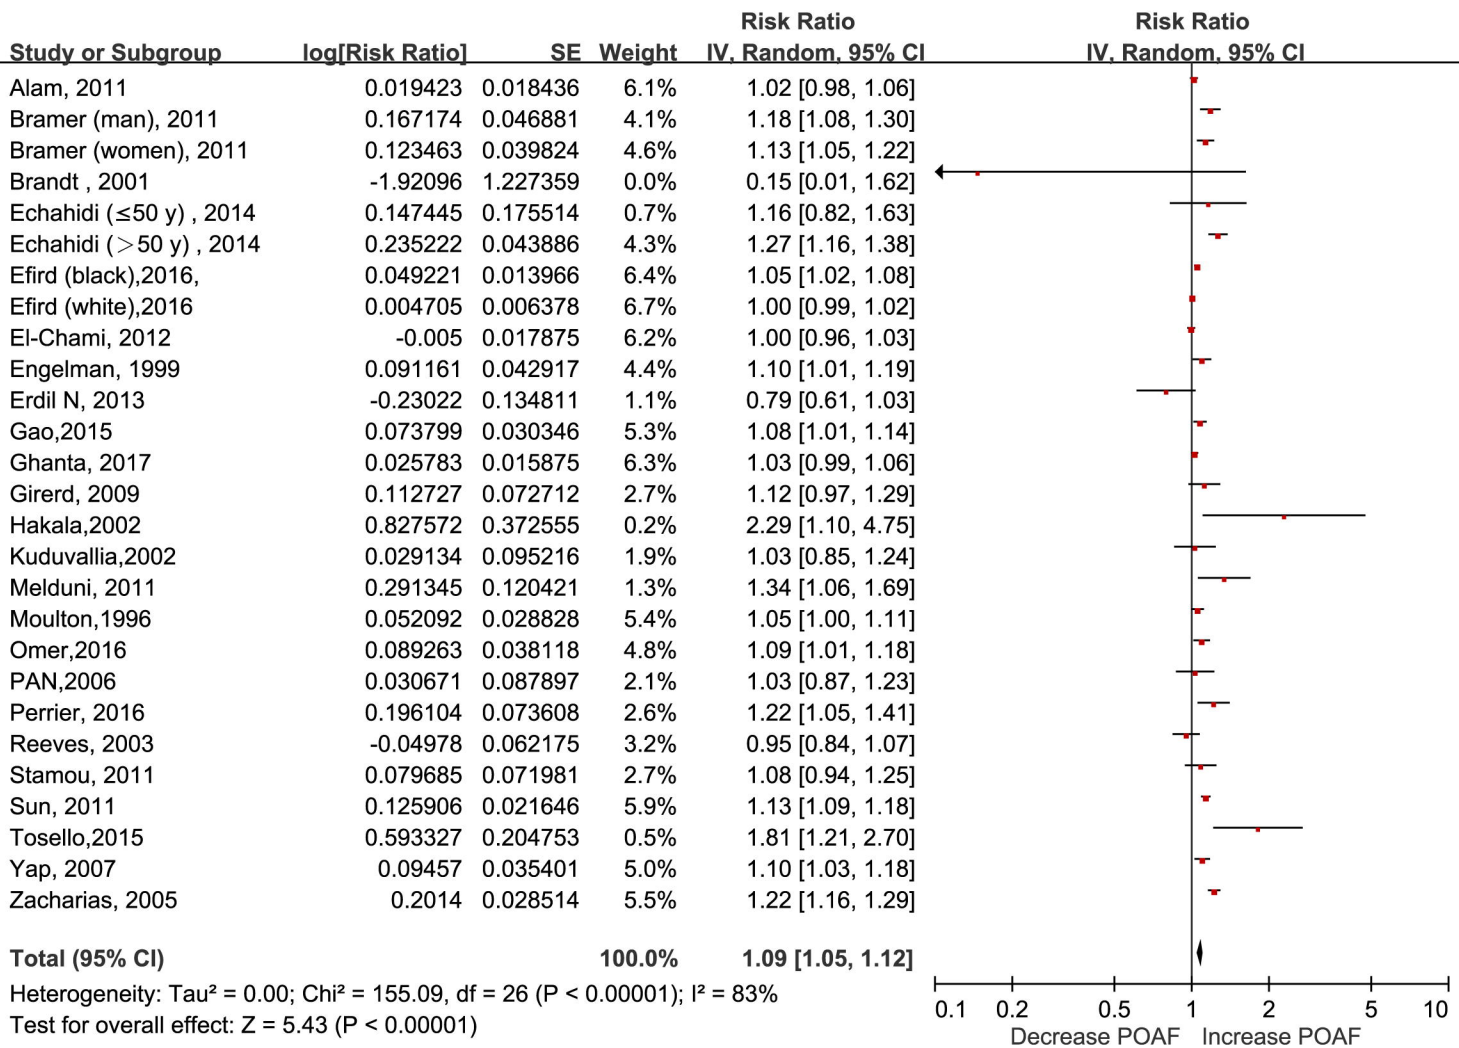

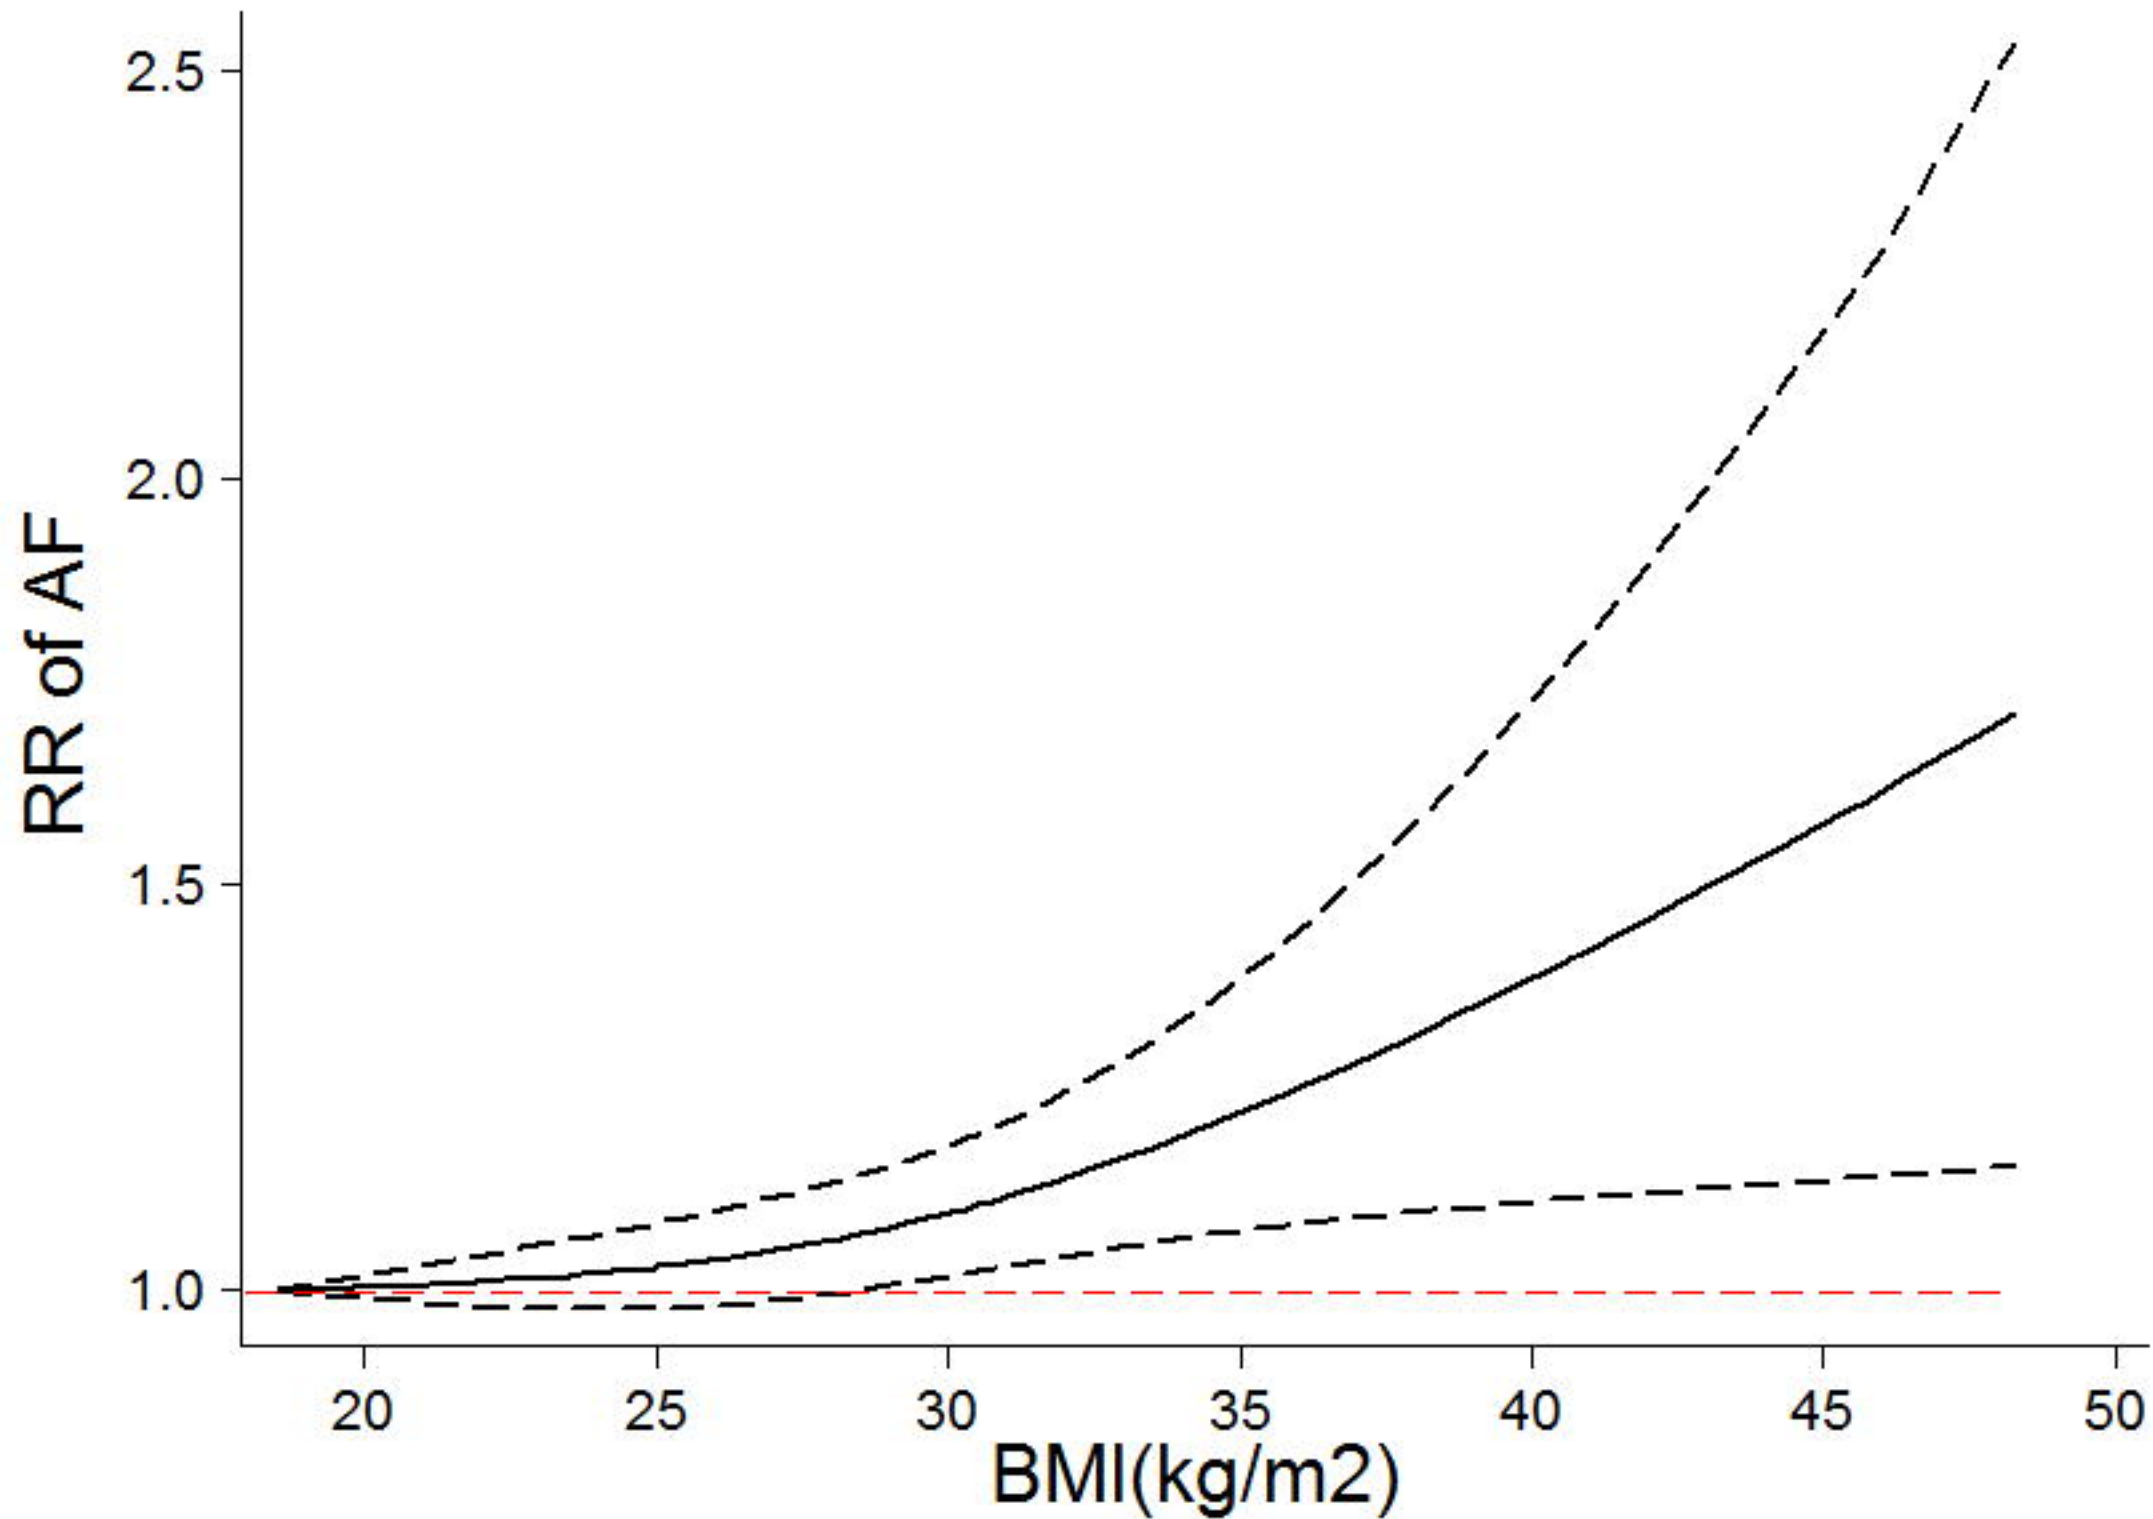

**A**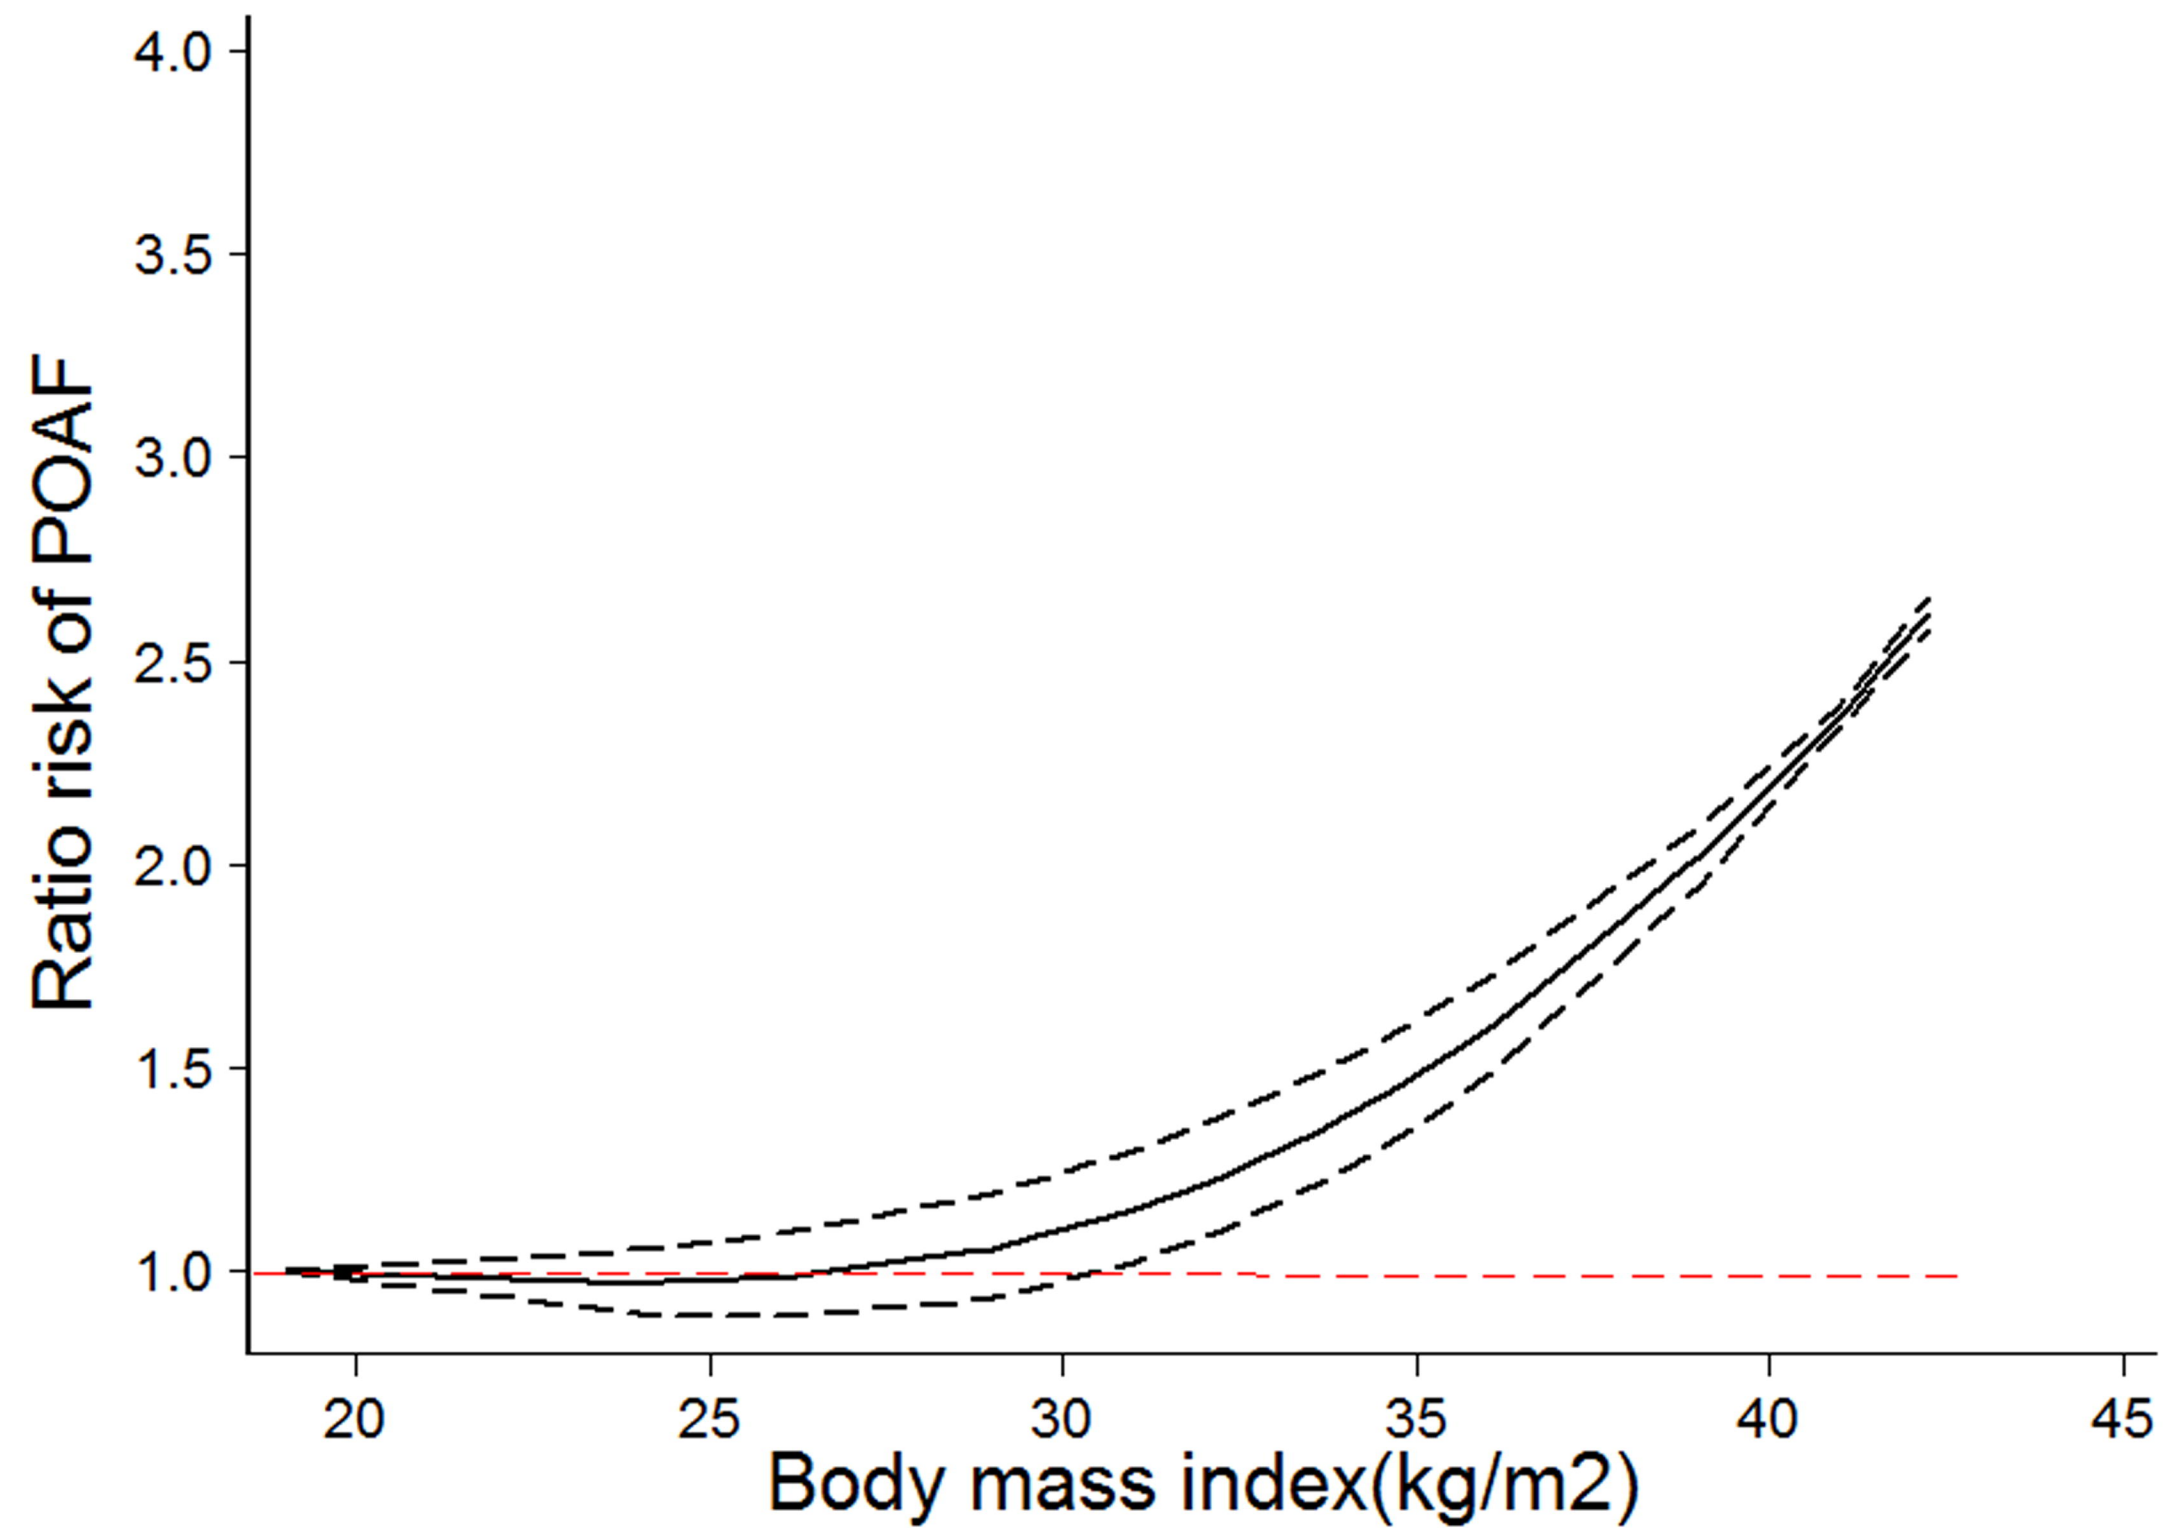**B**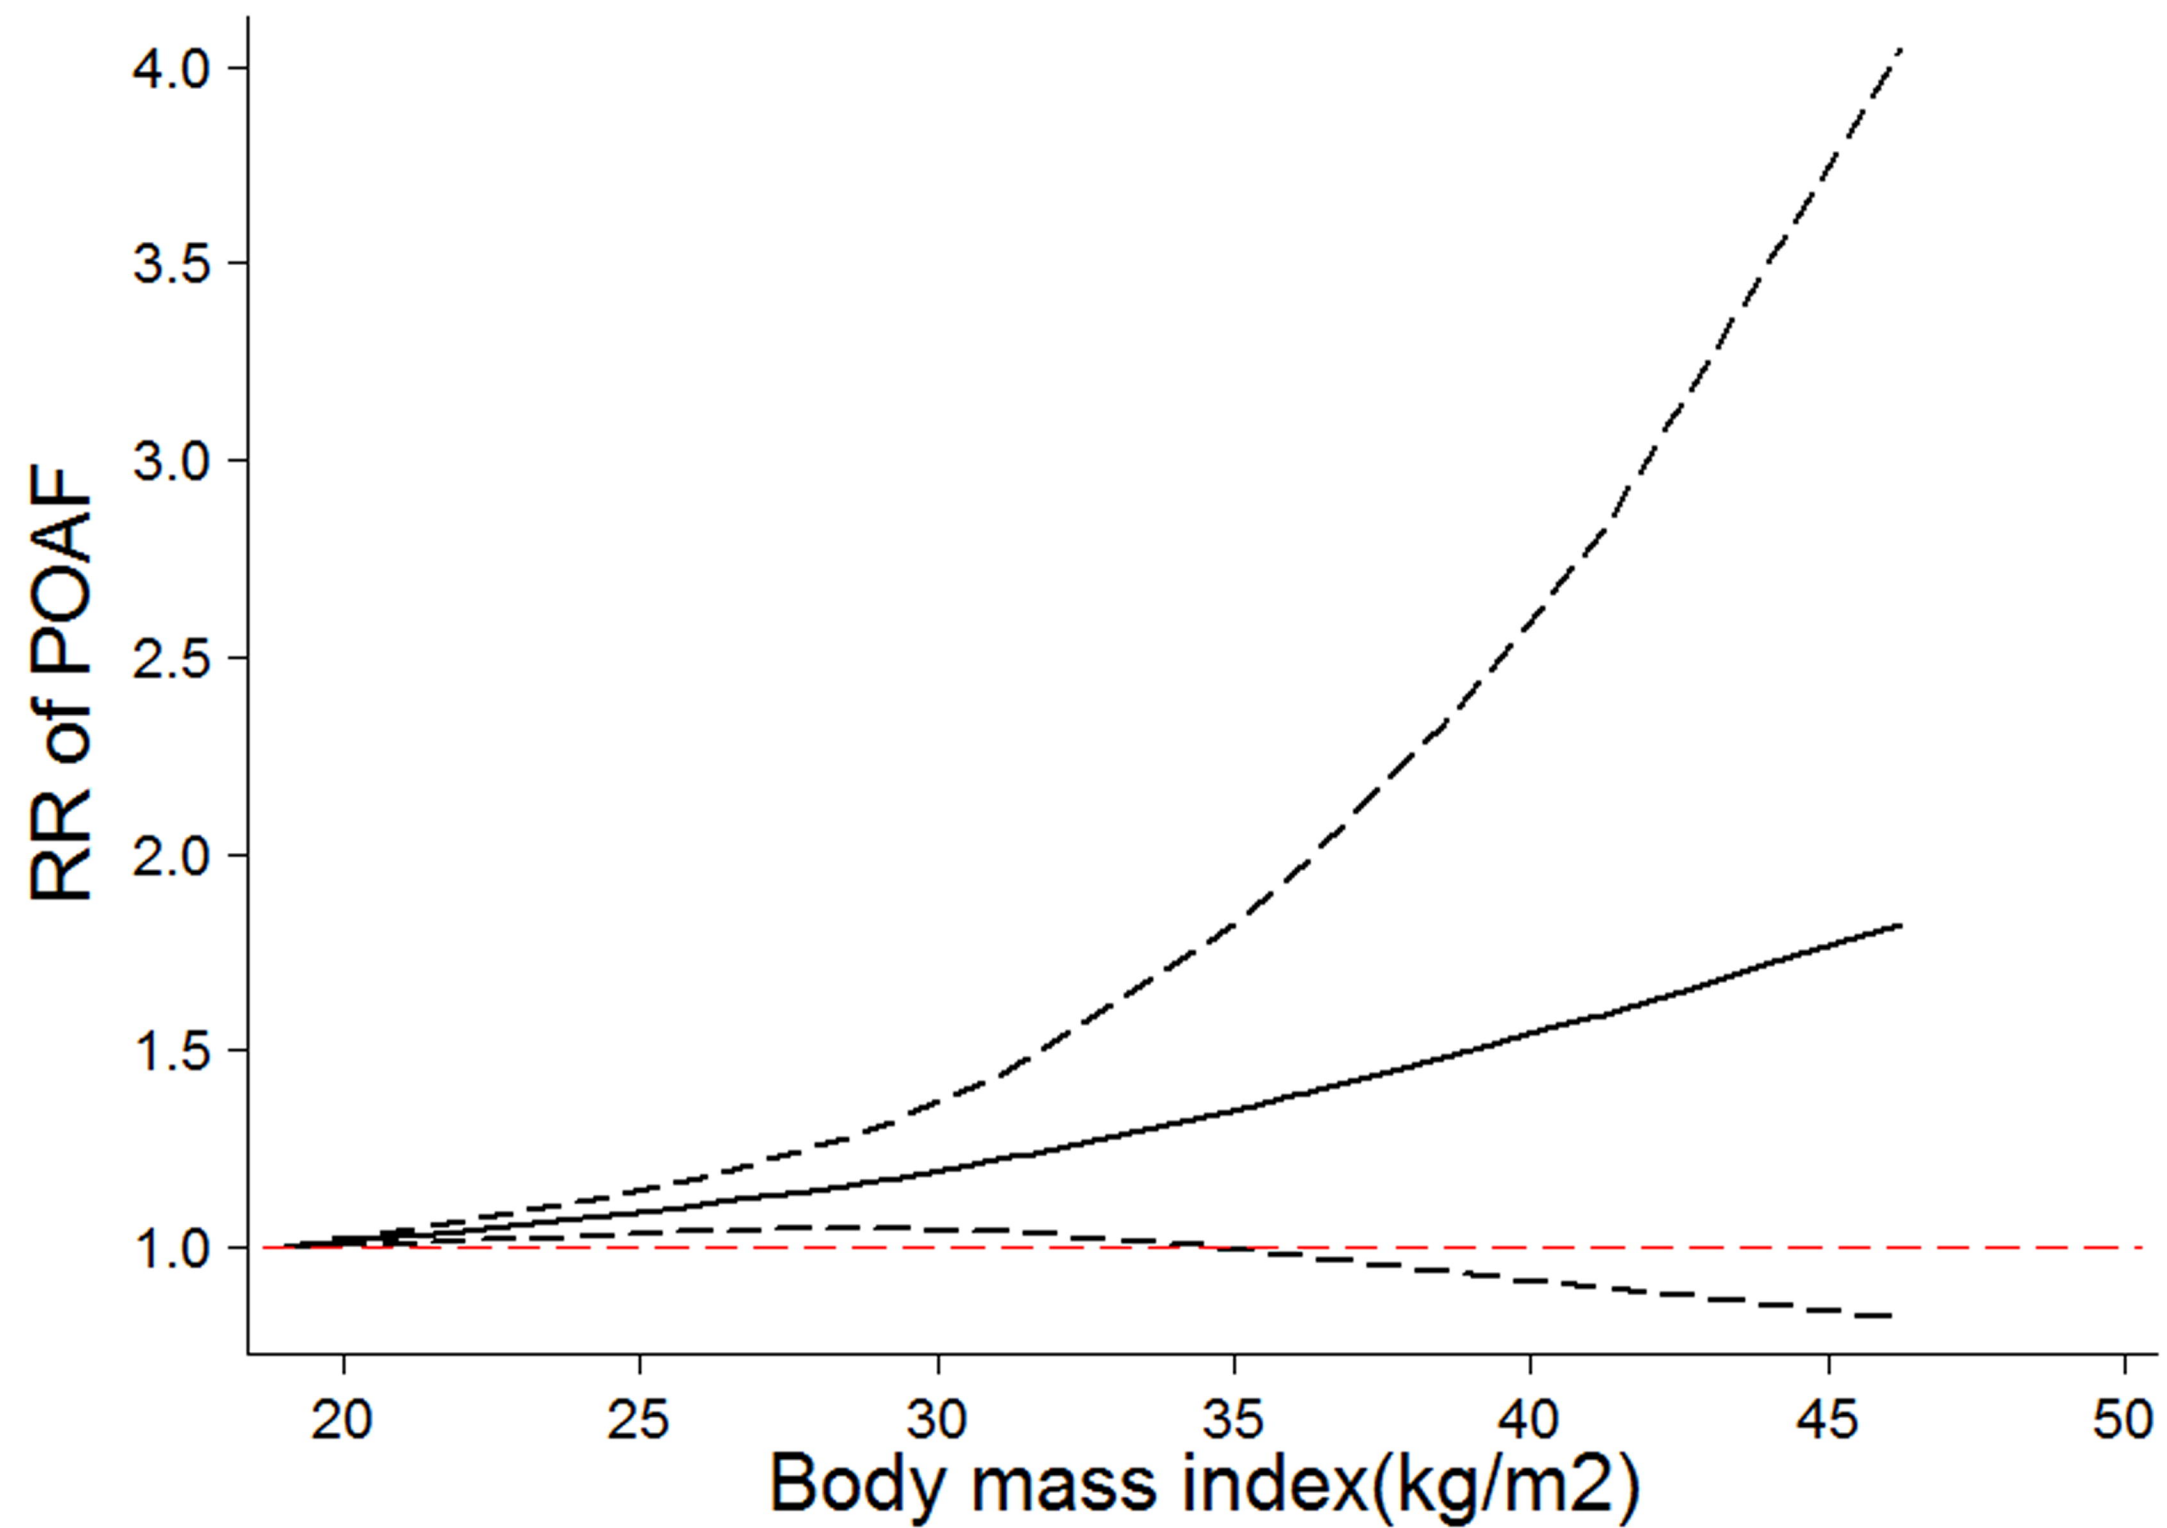

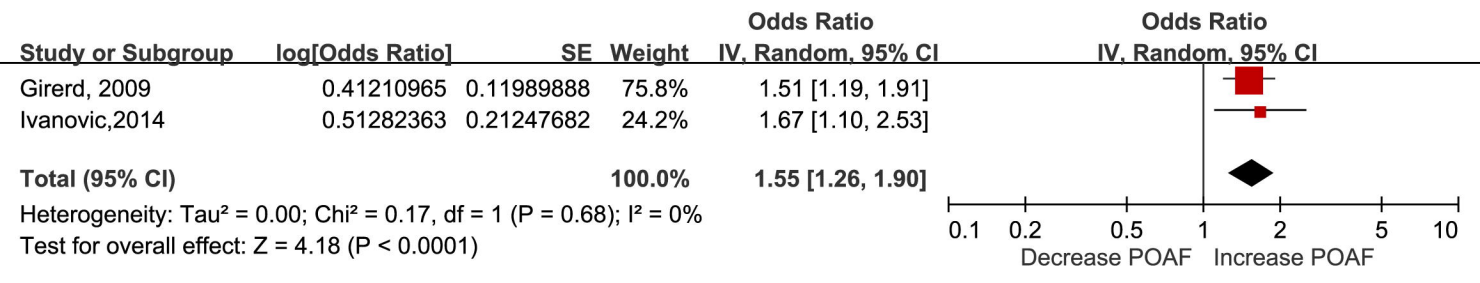

**Table 1. Basic characteristics of the 30 articles included in the meta-analysis.**

| Author, publication year, country      | Source of participants                              | Cases/N    | Mean age (years), male (%) | Study design               | Method of AF Detection  | BMI Data Reported      | Type of operation     | Adjustment for confounders                                                                                                                                                                                                                          |
|----------------------------------------|-----------------------------------------------------|------------|----------------------------|----------------------------|-------------------------|------------------------|-----------------------|-----------------------------------------------------------------------------------------------------------------------------------------------------------------------------------------------------------------------------------------------------|
| Alam, 2011, USA                        | St. Luke's Episcopal Hospital/Texas Heart Institute | 2867/13115 | 63.3, 54.4                 | Retrospective cohort study | ECG, treating physician | < 30<br>≥ 30           | CABG                  | Age, sex, preoperative morbidity, extent of CAD, No. of CABG, use of internal mammary artery, total circulatory bypass time, ACT.                                                                                                                   |
| Bramer, 2011, Netherlands              | Catharina Hospital                                  | 2517/9348  | 64.2, 72.6                 | Prospective cohort study   | ECG,                    | Continuous variable    | CABG or valve surgery | Age, BSA, COPD, PVD, prior stroke, prior MI, LVEF, creatinine, type of procedure, ECC duration, transfusion of RBCs, FFP and platelets, and reoperation for bleeding.                                                                               |
| Brandt, 2001, Germany                  | University Hospital Kiel                            | 207/500    | 63, 82                     | Retrospective cohort study | NA                      | <30<br>≥30             | CABG                  | Sex, history of prior MI, COPD, previous stroke, duration of CPB, ACT and number of distal anastomoses performed.                                                                                                                                   |
| Banach (aortic stenosis), 2007, Poland | Department of Cardiac Surgery in Lodz               | 62/150     | 63.3, 48.7                 | Retrospective cohort study | ECG,                    | ≤ 21<br>≥ 30           | valve surgery         | Age, BMI, pre-operative and post-operative LVEF, mitral regurgitation.                                                                                                                                                                              |
| Engelman, 1999, USA                    | Brigham and Women's Hospital                        | 1518/5168  | 67, 68                     | Retrospective cohort study | NA                      | < 20<br>20- 30<br>> 30 | CABG or valve surgery | Age, sex, EF, NYHA functional class, previous cardiac operation, pre-operative diabetes, peripheral and cerebral vascular disease, hypertension, renal failure, CHF, MI, COPD, smoking, urgency of operation, use of an ITA, and type of operation. |

|                          |                                                           |            |            |                            |                           |                                                          |      |                                                                                                                                                                                                                                                                                                                      |
|--------------------------|-----------------------------------------------------------|------------|------------|----------------------------|---------------------------|----------------------------------------------------------|------|----------------------------------------------------------------------------------------------------------------------------------------------------------------------------------------------------------------------------------------------------------------------------------------------------------------------|
| Echahidi, 2014, Canada   | The Quebec Heart Institute                                | 1370/5086  | 64.1, 76.5 | Retrospective cohort study | ECG                       | < 25<br>25- 30<br>30- 35<br>≥ 35<br>Continuous variable  | CABG | Age, gender, BMI, DM, left main coronary stenosis, preoperative medication with β-blockers, and ACT.                                                                                                                                                                                                                 |
| El-Chami, 2012, USA      | Emory University Hospital or Emory Crawford Long Hospital | 3486/18517 | 62.5, 71.7 | Retrospective cohort study | NA                        | NA                                                       | CABG | Age, race, gender, height, weight, BMI, body surface area, last creatinine level, angina, left main CAD, immunosuppressive therapy, preoperative insertion of an intra-aortic balloon pump, number of diseased vessels and preexisting medical conditions. Age, additive EuroSCORE score, and prolonged ventilation. |
| Erdil N, 2013, Turkey    | Inonu University, School of Medicine                      | 129/1040   | 60.2, 75.8 | Retrospective cohort study | ECG, physician assessment | Continuous variable                                      | CABG | Age, sex, DM, unstable heart failure, hypertension, PAD, three-vessel disease.                                                                                                                                                                                                                                       |
| Efird (Black), 2016, USA | East Carolina Heart Institute                             | 376/2329   | NA, 58.1   | Retrospective cohort study | Medical record            | < 18.5<br>18.5- 25<br>25- 30<br>30- 35<br>35- 40<br>≥ 40 | CABG | Age, sex, DM, Unstable heart failure, hypertension, PAD, Three-vessel disease.                                                                                                                                                                                                                                       |
| Efird (White), 2016, USA | East Carolina Heart Institute                             | 2627/11265 | NA, 72.8   | Retrospective cohort study | Medical record            | < 18.5<br>18.5- 25<br>25- 30<br>30- 35<br>35- 40<br>≥ 40 | CABG | Age, sex, DM, Unstable heart failure, hypertension, PAD, Three-vessel disease.                                                                                                                                                                                                                                       |

|                         |                                                                         |            |            |                               |                 |                                                          |                                 |                                                                                                                                                                                                                                                                                                                                                                                                                                                                                                                                                        |
|-------------------------|-------------------------------------------------------------------------|------------|------------|-------------------------------|-----------------|----------------------------------------------------------|---------------------------------|--------------------------------------------------------------------------------------------------------------------------------------------------------------------------------------------------------------------------------------------------------------------------------------------------------------------------------------------------------------------------------------------------------------------------------------------------------------------------------------------------------------------------------------------------------|
| Gao, 2016,<br>China     | First Affiliated<br>Hospital of<br>Nanjing<br>Medical<br>University     | 1183/4740  | 63.6, 68.7 | Retrospective<br>cohort study | NA              | < 18.5<br>18.5- 25<br>25- 30<br>30- 35<br>35- 40<br>≥ 40 | Valve<br>surgery                | Age, gender, surgery type, family<br>history of CAD, diabetes,<br>hypertension, heart failure and<br>lipid lowering medication.                                                                                                                                                                                                                                                                                                                                                                                                                        |
| Ghanta, 2017,<br>USA    | Regional<br>Society of<br>Thoracic<br>Surgeons<br>certified<br>database | 3052/13637 | 65.6, 70.7 | Retrospective<br>cohort study | Medical records | 18.5- 30<br>30 ≤ BMI ≤ 40<br>>40                         | CABG<br>and/or valve<br>surgery | STS PROM, age, sex, presence of<br>hypertension, DM, renal failure,<br>and heart failure.                                                                                                                                                                                                                                                                                                                                                                                                                                                              |
| Girerd, 2009,<br>Canada | Quebec Heart<br>Institute                                               | 433/2214   | 56.2, 100  | Nested case-<br>control       | ECG             | < 25<br>25- 30<br>30- 35<br>35- 40<br>≥ 40               | CABG                            | Waist circumference and age.                                                                                                                                                                                                                                                                                                                                                                                                                                                                                                                           |
| Gürbüz, 2014,<br>Turkey | Medicana<br>International<br>Ankara<br>Hospital                         | 139/790    | 62, 77.8   | Retrospective<br>cohort study | ECG             | ≤ 30<br>> 30                                             | CABG                            | Age, sex, DM, hypertension,<br>hyperlipidemia, preoperative<br>arrhythmia and atrial fibrillation,<br>PAD, history of cerebrovascular<br>disease, preoperative<br>echocardiography data, history of<br>clopidogrel use, operation type,<br>CPB and cross clamp times,<br>number of grafts, extubation time,<br>intensive care unit and hospital<br>length of stay times, amount of<br>drainage, number of used blood<br>and blood products, postoperative<br>creatinine and creatinine kinase<br>levels, occurrence of<br>postoperative arrhythmia and |



|                             |                                  |           |            |                            |                 |                                     |                 |                                                                                                                                                                                                                            |
|-----------------------------|----------------------------------|-----------|------------|----------------------------|-----------------|-------------------------------------|-----------------|----------------------------------------------------------------------------------------------------------------------------------------------------------------------------------------------------------------------------|
|                             |                                  |           |            |                            |                 |                                     |                 | stroke.                                                                                                                                                                                                                    |
| Hakala, 2002, Finland       | Kuopio University Hospital       | 30/92     | 61.7, 76   | Prospective cohort study   | ECG             | Continuous variable                 | CABG            | Age, preoperative haemoglobin, diabetes, HRV measurements.                                                                                                                                                                 |
| Ivanovic (MS), 2014, Serbia | Clinical Center of Serbia        | 103/477   | 60, 71     | Retrospective cohort study | ECG             | ≤ 30<br>> 30                        | CABG            | Age, gender.                                                                                                                                                                                                               |
| Kitahara, 2017, USA         | University of Chicago Medicine,  | 119/486   | 65/33.7    | Retrospective cohort study | NA              | <24.9<br>25-29.9<br>30-34.9<br>≥ 35 | cardiac surgery | Sex, height, weight, dyslipidemia, hypertension, DM, chronic renal failure, renal failure on dialysis, COPD, EF.                                                                                                           |
| Kuduvallia, 2002, UK        | Cardiothoracic Centre-Liverpool. | 1155/4713 | 62, 79     | Prospectively cohort study | ECG             | <30<br>30-35<br>>35                 | CABG            | Age, sex, previous cardiac surgery, LVEF, left main stem stenosis, number of major coronary arteries with stenosis >70%, priority of surgery, peripheral vascular disease, DM, renal dysfunction, and respiratory disease. |
| Melduni, 2011, USA          | Olmsted County, Minnesota        | 135/351   | 66.7, 67.2 | Prospective cohort study   | Medical records | Continuous variable                 | Cardiac Surgery | Age, BMI, hypertension, mitral regurgitation, diastolic function, type of operation, and perfusion time.                                                                                                                   |
| Moulton, 1996, USA          | Barnes Hospital                  | 833/2299  | 62.8, 65.1 | Retrospective cohort study | NA              | ≤ 30<br>> 30                        | CABG            | Age, sex, race, history of reoperation, CHF, prior MI, renal failure, DM, hypertension, COPD or stroke, CPB, aortic cross-clamp.                                                                                           |

|                       |                                                               |           |            |                            |     |                                                 |                       |                                                                                                                                                                                                                                                                                                                                                         |
|-----------------------|---------------------------------------------------------------|-----------|------------|----------------------------|-----|-------------------------------------------------|-----------------------|---------------------------------------------------------------------------------------------------------------------------------------------------------------------------------------------------------------------------------------------------------------------------------------------------------------------------------------------------------|
| Omer, 2016, USA       | Veterans Affairs hospital                                     | 215/1248  | 62.4, 99   | Retrospective cohort study | ECG | < 25<br>25- 30<br>≥ 30                          | CABG                  | Age, a history of hypertension, obesity, DM, inflammation, and longer pump and cross-clamp times.                                                                                                                                                                                                                                                       |
| Pan, 2006 USA         | Texas Heart Institute, St. Luke's Episcopal Hospital,         | 1913/9862 | 62.9, 75.4 | Retrospective cohort study | NA  | 20-24.9<br>25-29.9<br>30-34.9<br>35-39.9<br>≥40 | CABG                  | Age, sex, hypertension, pulmonary disease, hyperlipidemia, DM, total bypasstime, β-Blocker, antiarrhythmics, EF, triple-vessel CAD, left main CAD, renal insufficiency.                                                                                                                                                                                 |
| Perrier, 2016, France | University Hospital of Strasbourg                             | 311/1481  | 65.2, 81.2 | Prospective cohort study   | ECG | ≤ 35<br>> 35                                    | CABG                  | Age, eGFR<60 ml/min, PAD, anti-platelet treatment, CHA2DS2-VASC score, β-blockers                                                                                                                                                                                                                                                                       |
| Reeves, 2003, UK      | Patient Analysis & Tracking System, Dendrite Clinical Systems | 675/4372  | NA, 81.1   | Prospective cohort study   | ECG | < 25<br>25- 30<br>30- 35<br>≥ 35                | CABG                  | Continuously or discretely measured prognostic variables (age, Parsonnet score, number of grafts) and outcomes (blood loss; red blood cell, platelet, and fresh frozen plasma transfusion; postoperative hemoglobin levels; duration of ventilation, ICU stay, combined ICU and HDU stay, and total postoperative stay) were also grouped for analysis. |
| Stamou, 2011, USA     | Sanger Heart and Vascular Institute                           | 600/2440  | 62.5, 73.3 | Retrospective cohort study | NA  | 18.5- 24.9<br>25- 29.9<br>≥ 30                  | CABG or valve surgery | Propensity scores.                                                                                                                                                                                                                                                                                                                                      |

|                       |                                                 |            |            |                            |     |                                                |                        |                                                                                                                                                                                                                                                                                          |
|-----------------------|-------------------------------------------------|------------|------------|----------------------------|-----|------------------------------------------------|------------------------|------------------------------------------------------------------------------------------------------------------------------------------------------------------------------------------------------------------------------------------------------------------------------------------|
| Sun, 2011, USA        | Washington Hospital Center                      | 3462/12367 | 64.3, 71   | Retrospective cohort study | ECG | < 18.5<br>18.5- 25<br>25- 30<br>30- 40<br>≥ 40 | CABG                   | Age, sex, Race, HF, Left main coronary artery stenosis, Ventricular arrhythmias, Preop angina, Obstructive sleep apnea , DM, Hypertension, Family history of CAD, Previous stroke, Hypercholesterolemia, Hemodialysis, Current smoker, β-blockers, ACE inhibitors, Lipid-lowering drugs. |
| Tosello, 2015, France | Cardiac Surgery Unit of the Hopital Europeen G  | 36/176     | 70.5, 67.6 | Prospective cohort study   | ECG | Continuous variable                            | BAVR                   | Age, sex, weight, heihgt, smoking, DM, CKD, COPD, CAD, PVD, β-blocker, amiodarone, LVEF<50%, extracorporeal circulation, aortic cross-clamp time, transfusion in ICU, EUROSCORE >10                                                                                                      |
| Tadic M, 2011, Serbia | Clinical Center of Serbia                       | 72/322     | 59.9, 71.7 | Retrospective cohortstudy  | ECG | < 30<br>≥ 30                                   | CABG                   | Age, hypertension, DM, obesity, hypercholesterolemia, leukocytosis, and segmental kinetic disturbances of the left ventricle.                                                                                                                                                            |
| Yap, 2007, Australia  | St Vincent's Hospital and The Gee long Hospital | 1425/3968  | 66.4, 73   | Retrospective cohort study | NA  | 20- 30<br>30- 40<br>≥ 40                       | CABG and valve surgery | Age, sex, DM, hypercholesterolemia, renal impairment (Cr >0.2 mmol/L), preoperative dialysis, hypertension, cere brovascular disease, PVD, COAD, NYHA class IV, severe LV impairment (ejection fraction <30%), mean PA pressure, emergency status                                        |

|                         |                                                                             |           |    |                               |                                                                                                      |                                                                                |                          |                                                                                                                                                                                                                                                                                                              |
|-------------------------|-----------------------------------------------------------------------------|-----------|----|-------------------------------|------------------------------------------------------------------------------------------------------|--------------------------------------------------------------------------------|--------------------------|--------------------------------------------------------------------------------------------------------------------------------------------------------------------------------------------------------------------------------------------------------------------------------------------------------------|
| Zacharias,<br>2005, USA | Saint Vincent<br>Mercy<br>Medical<br>Center and<br>Saint Luke's<br>Hospital | 1496/6749 | NA | Retrospective<br>cohort study | ECG, physician<br>findings,<br>hospital or<br>physician chart<br>notes and<br>discharge<br>summaries | < 22<br>22- 25<br>25- 30<br>30- 35<br>35- 40<br>≥ 40<br>Continuous<br>variable | CABG or<br>valve surgery | Age, gender, white race, current<br>smoker, DM, hypertension, PRF,<br>COPD, PVD, MI, CHF, angina ,<br>arrhythmia , preoperative<br>medications, triple-vessel disease,<br>LMD, emergency surgery, mitral<br>valve surgery, aortic valve<br>surgery, off-pump, perfusion time,<br>cross-clamp time, and IABP. |
|-------------------------|-----------------------------------------------------------------------------|-----------|----|-------------------------------|------------------------------------------------------------------------------------------------------|--------------------------------------------------------------------------------|--------------------------|--------------------------------------------------------------------------------------------------------------------------------------------------------------------------------------------------------------------------------------------------------------------------------------------------------------|

Abbreviation: ECG, electrocardiograph; CABG, coronary artery bypass grafting; CAD, coronary artery disease; ACT, aortic clamp time; BSA, body surface area; COPD, chronic obstructive pulmonary disease; PVD, peripheral vascular disease; MI, myocardial infarction; LVEF, left ventricular ejection fraction; ECC, extra corporal circulation; RBC, red blood cell; FFP, fresh frozen plasma; CPB, cardiopulmonary bypass; EF, ejection fraction; NYHA, New York Heart Association; CHF, congestive heart failure; ITA, internal thoracic artery; BMI, body mass index; DM, diabetes mellitus; CAD, coronary artery disease; PAD, peripheral artery disease; STS, society of thoracic surgeons; PROM, predicted risk of operative mortality; HRV, heart rate variability; EF, ejection fraction; eGFR, Estimated Glomerular Filtration Rate; ICU, intensive care unit; HDU, high dependency unit; HF, heart failure; ACE, Angiotensin-Converting Enzyme; CKD, chronic kidney disease; PVD, peripheral vascular disease; PA, peripheral artery; PRF, preoperative renal failure; LMD, left main disease; IABP, intra-aortic balloon pump.

**Table 2. Subgroup analysis of body mass index and post-cardiac operation atrial fibrillation**

| Items                      | Number of studies | RR                  | I <sup>2</sup> | P               |                  |
|----------------------------|-------------------|---------------------|----------------|-----------------|------------------|
|                            |                   |                     |                | Within subgroup | Between subgroup |
| Result of primary analysis | 30                | 1.09[1.05, 1.12]    | 82             | <0.001          | NA               |
| Effect model               | Random effect     | 1.04[1.03, 1.04]    | 82             | <0.001          | NA               |
|                            | Fixed effect      | 1.03[1.03,1.04]     | 82             | <0.001          |                  |
| Age                        | ≥65               | 1.12 [1.05, 1.20]   | 78             | < 0.001         | 0.15             |
|                            | <65               | 1.06 [1.02, 1.12]   | 78             | 0.002           |                  |
| Region                     | Northern America  | 1.07 [1.04, 1.10]   | 84             | < 0.001         | 0.09             |
|                            | Europe            | 1.18 [1.00, 1.39]   | 75             | 0.05            |                  |
|                            | Asia              | 0.96 [0.85, 1.09]   | 70             | 0.53            |                  |
|                            | Oceania           | 1.11 [1.06, 1.17]   | 0              | <0.001          |                  |
| NOS scores                 | < 7 scores        | 1.02 [1.00, 1.04]   | 62             | 0.04            | 0.002            |
|                            | ≥7 scores         | 1.13 [1.09, 1.17]   | 64             | < 0.001         |                  |
| Publication year           | 1999-2010         | 1.12 [1.06, 1.17]   | 58             | < 0.001         | 0.25             |
|                            | 2011-2020         | 1.08[1.04, 1.11]    | 85             | < 0.001         |                  |
| AF Diagnosis               | ECG               | 1.14 [1.09, 1.19]   | 67             | <0.001          | 0.33             |
|                            | Others            | 1.03 [0.97, 1.09]   | 81             | 0.37            |                  |
| Sample size                | < 1000            | 1.20 [0.93, 1.53]   | 87             | 0.16            | 0.37             |
|                            | ≥ 1000            | 1.07 [1.04, 1.09]   | 75             | < 0.001         |                  |
| Cases                      | Case <100         | 1.57 [1.06, 2.31]   | 53             | 0.02            | 0.06             |
|                            | Case ≥100         | 1.08 [1.05, 1.11]   | 82             | < 0.001         |                  |
| Operation type             | CABG              | 1.216 [1.21, 1.219] | 80             | 0.001           | 0.007            |
|                            | Valve             | 1.34 [0.81, 2.22]   | 84             | 0.25            |                  |
|                            | Mixed             | 1.13 [1.06, 1.20]   | 79             | < 0.001         |                  |
| Adjusted factors           | Age (+)           | 1.08 [1.05, 1.12]   | 85             | < 0.001         | 0.64             |
|                            | Age (-)           | 1.04 [0.89, 1.22]   | 81             | < 0.001         |                  |

|                  |    |                   |    |         |      |
|------------------|----|-------------------|----|---------|------|
| Sex (+)          | 17 | 1.07 [1.04, 1.11] | 86 | < 0.001 | 0.28 |
| Sex (-)          | 10 | 1.12 [1.04, 1.21] | 65 | 0.003   |      |
| DM (+)           | 16 | 1.09 [1.05, 1.13] | 86 | < 0.001 | 0.89 |
| DM (-)           | 11 | 1.08 [1.02, 1.15] | 75 | 0.01    |      |
| Hypertension (+) | 13 | 1.07 [1.04, 1.11] | 85 | < 0.001 | 0.77 |
| Hypertension (-) | 14 | 1.09 [1.02, 1.16] | 85 | < 0.001 |      |
| COPD (+)         | 9  | 1.13 [1.09, 1.17] | 33 | < 0.001 | 0.10 |
| COPD (-)         | 18 | 1.07 [1.03, 1.11] | 83 | < 0.001 |      |
| CAD (+)          | 10 | 1.09 [1.03, 1.15] | 86 | < 0.001 | 0.60 |
| CAD (-)          | 17 | 1.07 [1.03, 1.11] | 81 | < 0.001 |      |

Abbreviation: NA, not available;

**Table 3:** Relative risks between BMI and atrial fibrillation incident after cardiac operation, from the nonlinear dose-response analysis

| <b>BMI (kg/m<sup>2</sup>)</b> | <b>Outcome</b> | Atrial fibrillation after cardiac operation |
|-------------------------------|----------------|---------------------------------------------|
|                               |                | RR (95% CI)                                 |
| 22                            |                | Ref                                         |
| 25                            |                | 1.03 (0.99-1.06)                            |
| 28                            |                | 1.06 (0.99-1.13)                            |
| 30                            |                | 1.07 (1.00-1.15)                            |
| 32                            |                | 1.12 (1.02-1.23)                            |
| 34                            |                | 1.16 (1.05-1.28)                            |
| 37                            |                | 1.23 (1.08-1.41)                            |
| 39                            |                | 1.29 (1.10-1.52)                            |
| 42                            |                | 1.39 (1.12-1.73)                            |
| 44                            |                | 1.46 (1.12-1.89)                            |
| 49                            |                | 1.65 (1.13-2.42)                            |
| 52                            |                | 1.76 (1.13-2.73)                            |
| $P_{\text{nonlinearity}}$     |                | 0.91                                        |

---

Abbreviation: BMI, body mass index; RR, relative risk.
